# Supplementary material for: RIM-BP2 regulates Ca2+ channel abundance and neurotransmitter release at hippocampal mossy fiber terminals
Source: eLife. 2024 Feb 8;12:RP90799. doi: 10.7554/eLife.90799 (PMC10945523; doi:10.7554/eLife.90799)
Supplement: Figure 1—source data 1. [file elife-90799-fig1-data1.xlsx]

## Sheet: Fig1B
ICa	duration	Mean	SEM	n		Cm	duration	Mean	SEM	n
WT	5	37.309	3.97025	9		WT	5	0.840086	0.231146	9
	10	40.2507	5.49901	9			10	6.65733	0.930797	9
	20	43.025	5.10558	9			20	17.4995	2.6941	9
	50	42.5291	5.37892	9			50	33.9239	5.2841	9
	100	44.3776	5.41214	9			100	52.3377	8.06481	9
KO	5	25.485	3.79452	8		KO	5	0.293175	0.233809	8
	10	26.606	3.54256	8			10	3.02154	1.23772	8
	20	26.4057	3.97983	8			20	12.5259	3.19373	8
	50	27.0865	4.90705	8			50	26.1491	5.6169	8
	100	27.3478	3.89996	8			100	41.2608	5.94531	8
	(ms)	(pA)					(ms)	(fF)

## Sheet: Fig1D
	voltage	Mean	SEM	n				-20	-10	0	10	20	30	40	50	60	70	(mV)
WT	-20	2.61848	1.43779	6		individual values (pA)	WT	0.58259	4.2862	14.502	24.427	24.386	22.492	17.644	11.34	6.1588	2.6841
	-10	10.8178	3.09291	6				0.052017	4.9624	14.45	24.261	22.638	20.672	13.212	9.8208	5.8259	2.9962
	0	33.3322	7.78935	6				-0.06242	7.5841	32.115	52.714	50.717	41.634	31.959	22.097
	10	45.3068	7.78668	6				1.0924	7.1471	31.085	47.315	47.533	38.888	30.118	22.659
	20	37.3318	5.84448	5				8.2412	20.349	42.633	48.282	41.385	32.739	24.188	18.789	14.794	11.454
	30	35.1947	5.21389	6				5.8051	20.578	65.208	74.842		54.743	43.965	31.169	19.392	9.5919
	40	26.8477	4.50014	6			KO	1.5605	4.5567	12.578	20.692	24.812	22.253	16.51	9.956	7.8962
	50	19.3125	3.23242	6				0.37452	3.8701	16.7914	34.269	36.516	31.21	20.911	16.916	9.1758	3.2459
	60	11.5427	3.33979	4				1.342	3.4955	12.328	18.945	19.475	17.322	13.639	9.2694	5.4306	1.186
	70	6.68155	2.25107	4				5.4306	14.045	31.335	36.329	38.451	27.527	18.164	13.171	5.4306	0.12484
KO	-20	2.7569	1.0402	5				5.0769	8.403	20.016	30.836	29.837	22.908	16.292	10.549	7.0119	1.6229
	-10	6.87406	1.9946	5
	0	18.6097	3.4861	5
	10	28.2142	3.54884	5
	20	29.8182	3.54563	5
	30	24.244	2.37662	5
	40	17.1032	1.19656	5
	50	11.9723	1.40132	5
	60	6.98902	0.723286	5
	70	1.54491	0.648387	4
	(mV)	(pA)

## Sheet: Fig1-S1
		5	10	20	50	100	(ms)			5	10	20	50	100	(ms)
individual ICa values (pA)	WT	45.879	45.567	47.752	45.005	58.675		individual Cm values (fF)	WT	0.051825	2.5509	12.011	18.993	34.152
		22.721	25.655	31.335	31.148	29.275				0.26129	4.2403	8.1219	36.148	41.126
		17.166	18.164	20.411	18.289	27.902				0.8382	8.0049	16.226	23.006	33.646
		29.525	29.899	34.019	33.894	29.15				2.0207	9.6072	24.273	46.512	62.773
		45.13	41.884	48.938	52.371	48.064				-0.075677	9.2273	33.957	67.922	103.33
		48.126	51.372	51.122	51.746	54.743				1.6294	5.2448	18.461	34.145	68.703
		37.203	36.391	38.139	35.143	35.58				0.93274	6.5032	16.358	30.608	52.885
		38.482	38.482	40.917	40.324	40.636				0.92175	4.1234	8.5638	15.607	22.34
		51.549	74.842	74.592	74.842	75.373				0.98055	10.414	19.524	32.374	52.084
	KO	19.912	22.783	15.73	12.297	21.972			KO	0.081532	-1.0357	4.2827	12.139	32.498
		19.163	15.543	26.154	18.039	21.785				0.095627	0.50513	5.1612	10.241	20.312
		32.646	34.893	46.191	49.811	45.629				0.45862	2.7234	15.472	35.854	56.75
		26.1385	29.837	27.527	29.4935	29.712				0.87132	3.6527	10.537	21.5895	39.631
		26.778	23.283	23.907	26.9965	27.527				-0.46978	0.96863	16.332	37.341	57.653
		44.194	40.152	35.236	41.853	36.734				1.3811	9.0595	30.372	56.002	65.699
		27.652	34.768	27.278	28.589	27.153				-0.59902	7.2553	15.306	23.19	33.425
		7.3968	11.589	9.2226	9.6127	8.2707				0.526	1.0434	2.7447	12.836	24.118
