# Supplementary material for: RIM-BP2 regulates Ca2+ channel abundance and neurotransmitter release at hippocampal mossy fiber terminals
Source: eLife. 2024 Feb 8;12:RP90799. doi: 10.7554/eLife.90799 (PMC10945523; doi:10.7554/eLife.90799)
Supplement: Figure 2—source data 1. [file elife-90799-fig2-data1.xlsx]

## Sheet: Fig2A
4 mM [Ca2+]ext
ICa	duration	Mean	SEM	n		Cm	duration	Mean	SEM	n
WT	5	47.0619	3.82719	8		WT	5	2.40047	0.838748	8
	10	50.494	5.12625	8			10	8.8552	1.09503	8
	20	50.4775	4.87562	8			20	19.3571	0.835705	8
	50	52.4784	5.3464	7			50	32.1864	4.55882	7
	100	54.2605	6.05515	6			100	51.5318	2.52752	6
KO	5	26.7082	4.66255	4		KO	5	-0.686882	0.846219	4
	10	32.0685	4.45362	4			10	13.2386	6.00586	4
	20	34.4325	3.73308	4			20	25.152	4.03864	4
	50	33.1377	2.7687	4			50	34.2182	10.0284	4
	100	33.3293	2.68451	3			100	50.606	10.9074	3
	(ms)	(pA)					(ms)	(fF)
the WT data in 2mM [Ca2+]ext are the same data set as Fig. 1B

## Sheet: Fig2B
	Ica (pA)					Cm (fF)
	2 mM [Ca2+]ext		4 mM [Ca2+]ext			2 mM [Ca2+]ext		4 mM [Ca2+]ext
	WT	KO	WT	KO		WT	KO	WT	KO
	58.675	21.972	55.242	32.355		34.152	32.498	59.22	28.976
	29.275	21.785	29.525	38.389		41.126	20.312	57.21	63.875
	27.902	45.629	45.692	29.244		33.646	56.75	44.839	58.967
	29.15	29.712	59.07			62.773	39.631	51.777
	48.064	27.527	65.557			103.33	57.653	44.103
	54.743	36.734	70.477			68.703	65.699	52.042
	35.58	27.153				52.885	33.425
	40.636	8.2707				22.34	24.118
	75.373					52.084
Mean	44.3776	27.3478	54.2605	33.3293		52.3377	41.2608	51.5318	50.606
SEM	5.41214	3.89996	6.05515	2.68451		8.06481	5.94531	2.52752	10.9074
n	9	8	6	3		9	8	6	3

## Sheet: Fig2-S1
4 mM [Ca2+]ext
individual ICa values (pA)		5	10	20	50	100	(ms)	individual Cm values (fF)		5	10	20	50	100	(ms)
	WT	49.125	56.366	53.245	49	55.242			WT	1.0671	6.098	20.116	29.512	59.22
		54.493	56.74	57.801	56.303					1.1086	6.6445	23.783	58.602
		38.451	43.132	41.447						2.7568	6.7554	18.605
		24.614	28.401	26.653	28.776	29.525				0.78222	8.6923	19.803	30.126	57.21
		46.129	49.312	49.187	44.225	45.692				4.9065	14.14	19.678	28.236	44.839
		51.731	52.142	55.783	51.902	59.07				0.11753	8.8894	16.142	21.061	51.777
		56.726	64.227	57.633	65.946	65.557				1.494	6.612	16.666	30.003	44.103
		55.226	53.632	62.071	71.197	70.477				6.971	13.01	20.064	27.765	52.042
	KO	19.382	20.505	24.406	31.71	32.355			KO	0.76734	5.6673	15.759	17.303	28.976
		40.365	40.324	42.321	40.199	38.389				0.32627	11.569	32.958	41.614	63.875
		24.115	37.639	36.547	33.801	29.244				-3.0178	30.705	30.705	59.235	58.967
		22.971	29.806	34.456	26.841					-0.82334	5.0132	21.186	18.721
