# Supplementary material for: RIM-BP2 regulates Ca2+ channel abundance and neurotransmitter release at hippocampal mossy fiber terminals
Source: eLife. 2024 Feb 8;12:RP90799. doi: 10.7554/eLife.90799 (PMC10945523; doi:10.7554/eLife.90799)
Supplement: Figure 3—source data 1. [file elife-90799-fig3-data1.xlsx]

## Sheet: Fig3A
ICa	duration	Mean	SEM	n		Cm	duration	Mean	SEM	n
1 mM [Ca2+]ext	5	17.45	3.04835	3		1 mM [Ca2+]ext	5	-0.681093	0.481183	3
	10	18.9966	1.25043	5			10	1.47648	0.424023	5
	20	19.9516	1.77577	5			20	6.2128	1.25273	5
	50	19.5	1.85773	5			50	16.3273	2.53338	5
	100	22.9085	1.66619	4			100	25.0083	5.48757	4
1.5 mM [Ca2+]ext	5	26.9623	3.52265	6		1.5 mM [Ca2+]ext	5	0.496795	0.22282	6
	10	30.9159	2.60867	7			10	3.84927	1.35501	7
	20	31.4494	3.03961	7			20	13.8815	1.87125	7
	50	32.0423	2.65955	6			50	23.4932	2.59101	6
	100	30.8544	4.0546	5			100	43.3466	6.74638	5
	(ms)	(pA)					(ms)	(fF)
the KO data in 2mM [Ca2+]ext are the same data set as Fig. 1B

## Sheet: Fig3B
ICa	[Ca2+]ext	Mean	SEM	n		Cm	[Ca2+]ext	Mean	SEM	n
WT	1	22.9085	1.66619	4		WT	1	25.0083	5.48757	4
	1.5	30.8544	4.0546	5			1.5	43.3466	6.74638	5
	2	44.3776	5.41214	9			2	52.3377	8.06481	9
	4	54.2605	6.05515	6			4	51.5318	2.52752	6
KO	2	27.3478	3.89996	8		KO	2	41.2608	5.94531	8
	4	33.3293	2.68451	3			4	50.606	10.9074	3
	(mM)	(pA)					(mM)	(fF)

## Sheet: Fig3C
ICa	[Ca2+]ext	norm.		Cm	[Ca2+]ext	norm.
WT	1	0.516218		WT	1	0.477825
	1.5	0.69527			1.5	0.82821
	2	1			2	1
	4	1.2227			4	0.984603
KO	2	1		KO	2	1
	4	1.21872			4	1.22649
	(mM)				(mM)

## Sheet: Fig3-S1
		5	10	20	50	100	(ms)			5	10	20	50	100	(ms)
individual ICa values (pA)	1 mM [Ca2+]ext		15.043	13.108	13.108			individual Cm values (fF)	1 mM [Ca2+]ext		0.93762	3.4657	19.907
		19.808	19.662	20.318	18.039	18.789				0.026671	0.58986	8.2941	18.117	27.057
		11.402	17.603	23.262	23.283	24.906				-0.47025	3.0563	4.2481	14.231	25.887
		21.14	22.409	21.785	22.846	26.217				-1.5997	1.4758	9.9967	21.853	36.813
			20.266	21.285	20.224	21.722					1.3228	5.0594	7.5287	10.276
	1.5 mM [Ca2+]ext	21.369	25.78	22.908					1.5 mM [Ca2+]ext	1.0949	5.7121	12.084
		33.645	35.455	33.332	32.396	24.562				0.46053	1.6673	8.0834	22.358	26.579
		41.385	31.023	37.265	38.638	43.132				-0.43057	-1.0215	15.912	27.187	66.028
			43.569	45.38	40.979	37.827					6.9585	16.703	29.855	49.581
		19.517	22.44	23.064	25.218	26.092				0.63874	1.0292	16.727	21.212	38.277
		23.345	28.869	30.17	28.245					0.27297	3.5131	7.1212	12.468
		22.513	29.275	28.027	26.778	22.659				0.9442	9.0862	20.54	27.879	36.268
