# Supplementary material for: RIM-BP2 regulates Ca2+ channel abundance and neurotransmitter release at hippocampal mossy fiber terminals
Source: eLife. 2024 Feb 8;12:RP90799. doi: 10.7554/eLife.90799 (PMC10945523; doi:10.7554/eLife.90799)
Supplement: Figure 4—source data 1. [file elife-90799-fig4-data1.xlsx]

## Sheet: Fig4B
ICa	duration	Mean	SEM	n		Cm	duration	Mean	SEM	n
WT	5	45.529	9.52212	4		WT	5	0.204154	0.158782	4
	10	50.4252	12.0705	5			10	0.458688	0.412591	5
	20	53.3974	11.7199	5			20	2.09833	0.579888	5
	50	52.8286	12.2068	5			50	13.1099	3.52347	5
	100	53.3798	11.19	5			100	38.3852	8.1044	5
KO	5	28.427	4.50788	4		KO	5	-0.329995	0.654482	4
	10	32.755	5.96859	4			10	0.059894	0.181444	4
	20	30.4612	6.61477	4			20	0.857485	0.631336	4
	50	31.7643	5.72856	4			50	5.78873	0.973363	4
	100	29.9383	5.50776	4			100	12.9354	1.27652	4
	(ms)	(pA)					(ms)	(fF)

## Sheet: Fig4C
Cm (fF)
	WT		KO		WT
[Ca2+]ext	2 mM		2 mM		1 mM
EGTA	0.5 mM	5 mM	0.5 mM	5 mM	5 mM
	12.011	4.2702	4.2827	0.87918	0.42694
	8.1219	2.0131	5.1612	0.1863	2.0672
	16.226	1.7329	15.472	-0.25324	1.6141
	24.273	1.6772	10.537	2.6177	0.79011
	33.957	0.79824	16.332		1.9191
	18.461		30.372
	16.358		15.306
	8.5638		2.7447
	19.524
Mean	17.4995	2.09833	12.5259	0.857485	1.36349
SEM	2.6941	0.579888	3.19373	0.631336	0.321917
n	9	5	8	4	5

## Sheet: Fig4D
ICa (pA)
	WT		KO		WT
[Ca2+]ext	2 mM		2 mM		1 mM
EGTA	0.5 mM	5 mM	0.5 mM	5 mM	5 mM
	47.752	41.884	15.73	47.814	23.857
	31.335	69.88	26.154	21.639	26.695
	20.411	90.946	46.191	18.789	42.279
	34.019	35.954	27.527	33.603	21.441
	48.938	28.323	23.907		22.617
	51.122		35.236
	38.139		27.278
	40.917		9.2226
	74.592
Mean	43.025	53.3974	26.4057	30.4612	27.3778
SEM	5.10558	11.7199	3.97983	6.61477	3.82635
n	9	5	8	4	5

## Sheet: Fig4-S1
		5	10	20	50	100	(ms)			5	10	20	50	100	(ms)
ICa individual values (pA)	WT		39.512	41.884	37.733	42.259		Cm individual values (fF)	WT		-0.23099	4.2702	25.409	61.521
		57.13	72.439	69.88	71.014	72.314				0.01217	1.6245	2.0131	11.587	30.577
		65.333	85.609	90.946	91.664	86.39				-0.084062	1.1944	1.7329	15.52	48.911
		35.663	28.058	35.954	36.017	40.011				0.26079	-0.53083	1.6772	7.5072	37.129
		23.99	26.508	28.323	27.715	25.925				0.62772	0.23636	0.79824	5.5263	13.788
	KO	40.053	48.345	47.814	47.19	44.88			KO	0.34839	-0.39194	0.87918	5.8571	15.344
		23.969	22.783	21.639	25.561	21.16				-0.43487	-0.032634	0.1863	5.1669	9.6648
		19.225	24.063	18.789	21.036	22.128				0.884	0.20134	-0.25324	3.739	12.208
		30.461	35.829	33.603	33.27	31.585				-2.1175	0.46281	2.6177	8.3919	14.525
