# Supplementary material for: RIM-BP2 regulates Ca2+ channel abundance and neurotransmitter release at hippocampal mossy fiber terminals
Source: eLife. 2024 Feb 8;12:RP90799. doi: 10.7554/eLife.90799 (PMC10945523; doi:10.7554/eLife.90799)
Supplement: Figure 5—source data 1. [file elife-90799-fig5-data1.xlsx]

## Sheet: Fig5A
individual EPSC values (pA)	WT	1.5 mM [Ca2+]ext		2 mM [Ca2+]ext
		1st pulse	2nd pulse	1st pulse	2nd pulse
		563	781	950	1265
		563	680	888	1137
		925	1427	1817	2254
		594	741	786	1113
		290	471	350	510
		706	1030	891	1281
		100	131	124	244
	KO	2 mM [Ca2+]ext		4 mM [Ca2+]ext
		1st pulse	2nd pulse	1st pulse	2nd pulse
		182	248	524	861
		106	159	472	642
		67	132	176	316
		606	844	2877	1114
		171	209	596	858
		152	282	1330	1850
		24	41	94	145

## Sheet: Fig5B
	Ratio
	WT (2 Ca/1.5 Ca)	KO (4 Ca/2 Ca)
	1.68739	2.87912
	1.57726	4.45283
	1.96432	2.62687
	1.32323	4.74752
	1.2069	3.48538
	1.26204	8.75
	1.24	3.91667
Mean	1.46588	4.40834
SEM	0.108003	0.780305
n	7	7

## Sheet: Fig5C
	Paired-Pulse Ratio
	WT		KO
[Ca2+]ext	1.5 mM	2 mM	2 mM	4 mM
	1.38721	1.33158	1.36264	1.64313
	1.20782	1.28041	1.5	1.36017
	1.5427	1.24051	1.97015	1.79545
	1.24747	1.41603	1.39274	0.387209
	1.62414	1.45714	1.22222	1.4396
	1.45892	1.43771	1.85526	1.39098
	1.31	1.96774	1.70833	1.54255
Mean	1.39689	1.4473	1.57305	1.36558
SEM	0.0582417	0.0920701	0.104748	0.172965
n	7	7	7	7
