# Supplementary material for: RIM-BP2 regulates Ca2+ channel abundance and neurotransmitter release at hippocampal mossy fiber terminals
Source: eLife. 2024 Feb 8;12:RP90799. doi: 10.7554/eLife.90799 (PMC10945523; doi:10.7554/eLife.90799)
Supplement: Figure 6—source data 1. [file elife-90799-fig6-data1.xlsx]

## Sheet: Fig6C, 6D, 6E
	normalized amplitude
	WT				KO
	2 mM		1.5 mM		2 mM		4 mM
stim. No.	Mean	SEM	Mean	SEM	Mean	SEM	Mean	SEM
1	1	0	1	0	1	0	1	0
2	1.37889	0.136319	1.48186	0.395888	3.67147	1.97574	1.64763	0.280317
3	1.85857	0.258721	1.78043	0.350428	5.72105	3.21868	2.45838	0.446861
4	2.02994	0.264447	2.59962	0.56949	6.50047	1.99913	1.99184	0.34831
5	2.11427	0.228503	3.5634	0.963746	10.7495	5.09454	2.61888	0.566525
6	1.8117	0.2033	2.65111	0.679393	6.88385	1.24028	3.24323	0.993565
7	1.6884	0.236432	2.73036	1.07792	11.4966	4.10366	2.46003	0.483591
8	1.55643	0.28298	2.89191	0.699456	7.97648	1.62531	2.3348	0.67029
9	1.36498	0.143512	2.46354	0.963416	11.0988	3.87626	3.2663	1.11576
10	1.041	0.204087	2.12162	0.628842	13.4014	4.83242	2.3788	0.514844
11	1.10056	0.206692	2.51991	0.658917	13.8713	3.63429	3.17719	1.18388
12	1.06437	0.198001	2.29638	0.650129	11.611	4.23982	2.64604	0.899793
13	0.968292	0.159064	1.54778	0.647952	8.25375	1.53268	2.46638	0.787049
14	0.743773	0.194974	1.73517	0.626824	8.74082	1.67303	2.48095	0.885746
15	0.558443	0.143601	1.35904	0.574954	12.7215	4.53222	2.66833	1.01542
16	0.631285	0.172779	1.3469	0.625039	10.4617	3.17238	2.03116	0.794654
17	0.443632	0.10773	1.67528	0.636817	9.32749	2.35923	2.21419	0.759004
18	0.545361	0.118571	1.04523	0.435938	12.2235	4.83471	2.28981	0.94337
19	0.524992	0.183051	1.56745	0.635901	8.68698	1.61823	2.33055	1.16309
20	0.487492	0.142409	1.17023	0.477448	9.55724	3.03103	2.10173	0.924399
21	0.648533	0.240398	1.0647	0.386186	9.9286	2.98319	2.37785	0.96335
22	0.371594	0.114484	0.959605	0.481559	8.34366	1.80396	1.52013	0.696062
23	0.328482	0.0909285	1.00234	0.420857	9.4663	2.2998	1.22731	0.495119
24	0.456216	0.194772	1.08546	0.507263	8.25324	1.9585	1.6388	0.709125
25	0.292803	0.0750552	0.794643	0.330079	6.74581	1.08728	2.35872	1.24975

## Sheet: Fig6-S1
	EPSC amplitude (pA)
	WT				KO
	2 mM		1.5 mM		2 mM		4 mM
stim. No.	Mean	SEM	Mean	SEM	Mean	SEM	Mean	SEM
1	983.774	284.474	513.067	154.903	114.19	37.8538	889.786	349.14
2	1232.33	304.112	590.6	104.862	220.131	75.0994	1043.08	358.477
3	1600.17	364.732	803.367	156.265	339.482	122.531	1509.55	458.666
4	1726.46	352.128	1127.23	184.634	479.744	109.557	1299.4	440.903
5	1828.25	331.097	1470.53	284.998	641.435	153.286	1574.47	530.675
6	1577.98	311.685	1150.5	234.99	698.179	235.297	1542.5	377.729
7	1441.16	276.881	1197.27	362.966	817.863	199.747	1365.42	376.908
8	1276.6	254.201	1227.4	220.178	734.113	223.276	1290.35	449.014
9	1199.45	231.641	1069.7	316.681	830.619	255.812	1362.31	340.817
10	912.643	203.829	923.433	216.031	904.696	191.637	1288.36	350.646
11	974.399	224.217	1034.57	191.844	1059.2	233.696	1192.95	302.781
12	882.637	170.874	928.233	175.34	839.804	236.02	1102.77	361.657
13	789.369	151.51	640.967	202.514	784.899	258.234	1025.59	273.773
14	586.31	137.927	673.2	182.421	760.024	187.781	994.115	223.903
15	491.548	128.328	537.933	174.98	908.631	274.895	882.036	178.056
16	467.952	104.757	519.533	193.422	755.417	150.624	776.438	189.931
17	346.917	94.8621	611.3	188.918	810.815	263.151	823.557	186.517
18	421.036	91.9477	424.233	134.441	840.952	237.532	666.255	172.212
19	340.976	80.0296	555.033	192.563	818.101	235.675	595.224	133.733
20	315.095	66.7334	409.633	155.439	703.845	135.76	566.703	122.573
21	417.405	98.7631	389.833	116.281	744.571	190.474	700.146	189.609
22	255.982	54.9871	351.233	154.786	673.03	127.13	430.51	93.4025
23	259.262	72.1043	355.667	130.396	753.804	168.774	399.026	116.822
24	282.065	81.1924	370.867	168.154	717.458	210.323	497.875	154.813
25	221.667	52.6603	277.067	100.013	624.363	142.114	488.24	138.997

## Sheet: Fig6-S2 A
individual EPSC values (pA) (WT in 2 mM [Ca2+]ext)
holding potential stim. No.	-70	-70	-70	-60	-70	-70	-80	(mV)
1	925	1051	2581	628	367	864	418
2	1287	909	2951	1090	566	960	779
3	1016	1475	3607	1636	1084	1407	804
4	1226	2080	3491	1883	979	1198	1045
5	1336	2461	3137	1890	797	2034	946
6	1193	2473	2812	1574	727	1280	828
7	865	1923	2639	1506	514	1460	1063
8	764	2112	1695	1780	672	1067	628
9	922	1352	2262	1138	628	1481	484
10	672	917	1613	1398	348	896	356
11	1112	639	1931	1294	562	865	231
12	785	580	1366	1091	552	1368	291
13	643	491	1487	995	401	830	586
14	799	172	885	961	484	489	176
15	439	218	853	803	87	697	240
16	261	169	933	613	535	400	300
17	264	66	878	253	336	325	302
18	265	122	689	582	278	657	294
19	193	20	383	458	532	546	204
20	213	50	308	538	366	375	304
21	317	0	534	620	699	428	252
22	395	0	406	156	347	279	209
23	113	32	482	326	235	485	100
24	223	3	341	494	542	150	159
25	202	0	423	286	110	259	256

## Sheet: Fig6-S2 B
individual EPSC values (pA) (WT in 1.5 mM [Ca2+]ext)
holding potential stim. No.	-70	-70	-70	-60	-70	(mV)
1	480	1117	337	314	265
2	441	501	858	702	334
3	775	1259	1043	395	479
4	926	1499	1559	931	566
5	853	1614	1913	1888	770
6	878	1684	1756	579	759
7	553	1639	2124	1292	163
8	725	1683	1793	972	802
9	535	1384	1885	1197	148
10	523	1312	1493	781	378
11	453	1265	1461	1097	714
12	546	1007	1535	799	621
13	316	715	1345	557	179
14	348	548	1347	636	381
15	273	493	1206	412	237
16	226	402	1265	418	217
17	246	335	1303	597	476
18	293	332	793	565	44
19	150	256	1250	523	509
20	143	88	907	535	286
21	159	199	768	469	276
22	263	109	955	247	141
23	148	131	846	320	280
24	120	33	977	398	260
25	90	105	645	230	277

## Sheet: Fig6-S2 C
individual EPSC values (pA) (KO in 2 mM [Ca2+]ext)
holding potential stim. No.	-70	-70	-60	-70	-60	-80	-70	(mV)
1	98	141	12	324	71	68	80
2	57	132	182	608	293	170	41
3	162	200	297	1042	228	345	58
4	342	347	206	1051	543	581	236
5	415	436	483	1487	436	913	281
6	976	623	126	1956	318	694	207
7	833	598	413	1917	575	1061	296
8	839	436	159	1941	568	931	260
9	803	381	385	2235	745	1024	181
10	1193	378	491	1888	709	1009	591
11	1100	507	391	2287	1019	1285	751
12	1157	452	423	2096	411	995	330
13	657	443	157	2261	486	991	516
14	803	432	172	1759	525	1024	617
15	542	323	395	2236	725	1802	376
16	819	485	330	1486	835	890	360
17	859	496	245	2291	249	1021	560
18	423	500	478	2213	648	1048	520
19	727	592	147	2098	701	1085	371
20	663	791	328	1464	420	678	543
21	620	339	313	1823	497	928	673
22	426	612	176	1261	549	1021	673
23	978	468	262	1652	479	759	650
24	1139	422	219	1802	329	521	564
25	423	608	98	1354	506	825	559
26					777

## Sheet: Fig6-S2 D
individual EPSC values (pA) (KO in 4 mM [Ca2+]ext)
holding potential stim. No.	-70	-70	-60	-80	-70	-80	-70	-70	(mV)
1	410	1116	127	3561	1067	1006	313	68
2	593	1046	313	3914	1122	906	820	181
3	857	1540	495	4951	1671	2418	653	330
4	866	1514	485	4757	1345	1472	437	217
5	715	1792	712	5793	1474	1846	784	316
6	1694	1353	432	4456	1607	2016	860	659
7	1345	1426	401	4334	1141	1622	1001	331
8	1443	987	257	4900	1169	1204	638	445
9	1588	1008	372	4024	804	1492	1551	687
10	1447	1151	528	4017	815	1440	1313	190
11	1249	710	564	3703	937	948	1199	721
12	1984	592	340	3720	521	484	1143	507
13	1953	629	324	2740	1065	342	1048	435
14	1442	877	205	2505	871	569	1314	520
15	1195	437	553	2191	961	424	934	596
16	1326	388	111	1908	789	436	1076	452
17	1665	439	263	1768	702	579	995	427
18	1612	444	232	754	644	83	1100	527
19	1035	190	274	1102	653	25	900	678
20	1210	141	351	932	597	203	647	536
21	1686	252	253	937	732	95	1202	531
22	498	161	188	817	582	81	795	403
23	1012	173	65	483	453	90	724	253
24	1406	118	156	906	400	118	593	388
25	1292	43	340	501	293	153	592	717
26					910
