# Supplementary material for: RIM-BP2 regulates Ca2+ channel abundance and neurotransmitter release at hippocampal mossy fiber terminals
Source: eLife. 2024 Feb 8;12:RP90799. doi: 10.7554/eLife.90799 (PMC10945523; doi:10.7554/eLife.90799)
Supplement: Figure 7—source data 1. [file elife-90799-fig7-data1.xlsx]

## Sheet: Fig5C
total signal intensity (A.U.)
	Cav2.1				Cav2.2				Munc13-1
AZ #	WT	KO		AZ #	WT	KO		AZ #	WT	KO
1	0.378211	0.316495		1	0.437064	3.14135		1	0.52842	0.669841
2	0.41261	1.66743		2	1.16372	0.552005		2	0.447143	2.05934
3	1.27846	0.254434		3	0.736926	0.602091		3	1.1841	0.291846
4	1.60532	1.05288		4	1.17558	5.01064		4	1.33442	1.07366
5	1.16834	0.364519		5	1.09336	2.30044		5	0.868985	0.595918
6	2.24132	2.69414		6	2.41465	0.831755		6	1.86632	2.36085
7	0.999956	1.05527		7	0.380711	0.456143		7	0.535709	1.67094
8	0.580466	0.620107		8	0.216371	2.17814		8	0.547669	0.555848
9	1.32862	0.28538		9	0.523824	0.369044		9	0.618279	0.414212
10	1.28045	1.06198		10	1.51928	1.08773		10	0.971527	1.14589
11	2.57057	0.70171		11	1.32804	0.465076		11	1.68769	0.641118
12	0.706933	1.23342		12	0.46952	1.3567		12	0.518701	1.61423
13	2.8552	1.4949		13	1.28048	0.312002		13	1.56959	2.0993
14	4.25757	0.362231		14	1.41726	0.820689		14	3.71134	0.391972
15	1.41952	1.30492		15	1.06182	0.82131		15	1.16008	1.37183
16	0.286602	0.286561		16	0.171016	0.134545		16	0.356724	0.309976
17	4.06104	0.0981465		17	0.935672	0.765917		17	2.81691	0.377942
18	0.176527	1.53556		18	0.522236	0.49487		18	0.555205	1.08781
19	0.612752	0.440271		19	1.86165	0.515522		19	0.670334	0.324312
20	2.55335	0.984111		20	2.57806	2.11325		20	1.71796	1.10105
21	0.53742	0.242238		21	0.157224	3.78254		21	0.458248	0.448534
22	0.974048	0.871771		22	1.51347	0.795691		22	0.910784	1.06467
23	1.47324	0.501656		23	0.1762	2.46001		23	1.37429	1.04448
24	1.00902	0.21355		24	0.867865	1.20105		24	1.19863	0.375379
25	2.18802	1.57312		25	0.731625	0.420701		25	1.90716	1.23139
26	0.802243	1.56433		26	0.235126	2.44231		26	0.7474	2.11913
27	0.441859	0.215736		27	0.476235	1.39826		27	0.503149	0.574347
28	0.626198	0.591671		28	0.515794	0.557855		28	0.616252	0.457096
29	0.768379	0.309214		29	2.15369	0.311656		29	1.16152	0.747068
30	2.07298	0.461864		30	0.0647102	2.94937		30	1.80587	0.715944
31	1.1025	3.45765		31	1.13087	2.90479		31	0.755217	4.90991
32	0.619182	1.15003		32	1.34323	1.28531		32	0.393001	1.35982
33	0.582846	1.46556		33	0.584739	0.695225		33	0.659686	1.82525
34	0.403118	1.64788		34	0.622154	0.383281		34	0.472553	1.77019
35	0.319843	1.80506		35	0.397629	0.261776		35	0.399951	2.59237
36	2.44772	1.44034		36	0.748577	3.24649		36	2.54519	1.2572
37	0.909064	0.604965		37	0.0852832	0.427513		37	0.890014	0.920607
38	0.94758	0.121902		38	1.67073	1.20999		38	0.80891	0.370622
39	0.867848	0.388839		39	1.33529	5.09113		39	0.853856	0.306949
40	0.346499	0.881885		40	0.200034	2.83755		40	0.624199	0.650668
41	2.58626	0.358593		41	0.0435873	0.495535		41	1.65471	0.468526
42	1.13201	0.664514		42	0.174817	1.20993		42	0.88384	0.465205
43	0.0430749	0.327549		43	1.55404	1.95901		43	0.447854	0.536529
44	1.36748	0.883117		44	1.42628	1.72332		44	1.05598	1.86768
45	1.32983	0.172359		45	0.240419	0.96535		45	1.0006	0.497825
46	0.95682	1.22979		46	0.0663999	1.7329		46	0.83408	1.98186
47	4.38358	0.294593		47	0.611911	1.49482		47	4.32874	0.439527
48	1.1171	0.336783		48	3.10544	1.22603		48	1.54352	0.518439
49	0.449699	0.456954		49	1.21068	1.47267		49	0.500585	0.38232
50	0.485823	0.770197		50	0.366884	2.41966		50	0.536971	1.09731
51	0.471698	0.59483		51	0.408377	4.59435		51	0.609224	0.938579
52	1.71256	0.615409		52	2.2178	0.295345		52	1.36449	0.843056
53	2.17894	0.955588		53	1.27632	1.53898		53	2.26641	1.01976
54	2.93597	0.163263		54	0.78388	0.678983		54	1.70154	0.410117
55	1.54913	0.933118		55	0.179012	5.10131		55	1.42829	0.997374
56	1.35227	2.02671		56	0.750324	0.389987		56	1.65724	2.54579
57	0.189443	0.280136		57	1.17373	0.338245		57	0.37854	0.413552
58	1.37743	1.60661		58	0.189572	1.09015		58	1.58242	1.34581
59	2.13678	0.23683		59	0.481429	0.149859		59	1.67269	0.374182
60	2.00533	0.590833		60	1.76296	1.32306		60	1.90251	0.564813
61	0.405768	0.390102		61	0.530475	0.59207		61	0.494251	0.400317
62	0.30987	1.2934		62	1.45051	1.83399		62	0.424183	1.54178
63	0.910548	0.472984		63	0.514253	0.0853775		63	0.562164	0.493389
64	0.143717	1.5214		64	0.556644	0.981413		64	0.239075	2.3598
65	2.11902	1.37887		65	1.47162	0.531909		65	1.82291	2.66586
66	0.608327	0.333571		66	0.822208	1.97714		66	1.058	0.414568
67	2.04193	0.248936		67	0.25945	0.928235		67	2.0146	0.313463
68	0.144571	0.213351		68	2.15392	0.408769		68	0.377428	0.427298
69	0.958452	0.881839		69	0.621841	0.769896		69	1.15998	0.694622
70	0.921088	0.204936		70	0.467795	0.618013		70	1.1231	0.292266
71	0.6958	2.46238		71	0.890361	2.36515		71	0.491136	4.09718
72	0.335818	0.428336		72	0.23939	0.768969		72	0.374143	0.310906
73	2.55645	0.276891		73	1.38242	3.57625		73	1.71746	0.362915
74	2.33685	1.43166		74	0.969695	0.756037		74	1.14986	3.02258
75	0.599085	1.51766		75	0.419085	0.561297		75	0.425175	2.00694
76	0.404878	0.450108		76	1.63384	2.70057		76	0.566108	0.572062
77	0.566867	1.4292		77	0.414252	0.259709		77	0.333309	1.96081
78	0.355218	0.201762		78	1.09361	1.18332		78	0.285218	0.499565
79	0.446286	0.863049		79	0.325791	0.494713		79	0.450568	0.878229
80	2.35301	0.650109		80	0.174385	3.17114		80	2.29295	0.766743
81	0.528205	1.88131		81	2.28296	0.421726		81	0.414778	2.73173
82	0.246474	0.675557		82	0.354423	0.914168		82	0.434097	1.30482
83	0.364479	0.77506		83	1.85176	1.10868		83	0.714366	0.993911
84	1.06097	0.0864076		84	1.31047	2.10855		84	0.944214	0.509629
85	0.153214	0.719389		85	0.875987	2.56669		85	0.381589	0.895837
86	1.3397	1.38708		86	0.369972	2.86579		86	1.91223	1.37082
87	1.7064	0.326382		87	0.788764	1.14502		87	1.10136	0.700164
88	0.86675	1.16722		88	0.131263	0.384559		88	0.57546	1.1667
89	0.462884	0.763644		89	0.366174	0.501821		89	0.342611	1.12673
90	0.905091	0.23512		90	0.373599	0.496896		90	0.630269	0.66536
91	0.227702	1.12648		91	1.67486	0.335616		91	0.210788	1.4306
92	0.478237	0.490724		92	0.210859	0.849373		92	0.712019	0.903768
93	4.37845	0.653758		93	0.722672	0.465111		93	2.79511	0.357028
94	0.549988	0.200099		94	0.707327	0.652391		94	0.309425	0.822099
95	0.761545	0.75601		95	0.675943	1.27342		95	0.801041	1.13262
96	1.24936	1.03825		96	1.86259	1.10562		96	0.597754	1.92162
97	0.328102	0.186721		97	0.445024	4.16927		97	0.337459	0.466314
98	1.54371	0.822944		98	0.871162	0.422827		98	1.18885	1.39518
99	0.825012	0.960854		99	1.1907	1.93614		99	0.894825	1.36183
100	0.199146	1.07596		100	0.525294	3.8105		100	0.376963	1.11736
101	0.545602	0.128393		101	0.830086	1.41253		101	0.581116	0.283665
102	0.196866	0.501645		102	0.607219	0.858403		102	0.369194	0.808665
103	0.857981	4.56759		103	0.216189	0.870297		103	0.394867	3.67407
104	0.572832	0.172831		104	0.57109	0.474537		104	0.718438	0.400204
105	0.318195	0.49487		105	0.572589	0.125688		105	0.401721	0.685462
106	0.246182	0.519442		106	0.321039	3.99671		106	0.337348	0.647555
107	0.0878783	1.40017		107	0.790124	1.93824		107	0.343684	0.917153
108	1.14826	1.53816		108	0.300631	0.724403		108	0.640167	1.56728
109	1.23191	0.313212		109	-0.00790658	1.29043		109	0.781331	0.559414
110	2.57699	0.423439		110	0.0905684	2.16946		110	2.54274	1.26672
111	1.15881	0.969271		111	0.55762	1.43786		111	0.958749	0.904975
112	0.284507	0.375504		112	0.182785	3.395		112	0.382676	0.486596
113	0.756545	0.0765506		113	0.494996	0.319735		113	0.66872	0.386749
114	0.70257	0.204858		114	0.596681	3.57415		114	0.437572	0.310649
115	0.689497	0.789284		115	1.0849	1.6557		115	0.590272	0.65883
116	0.771152	0.779648		116	1.45639	0.127428		116	0.396023	1.22817
117	3.89388	0.953298		117	0.625977	1.83882		117	2.48758	1.9433
118	2.25014	0.525467		118	0.0884617	0.647934		118	1.82576	1.09321
119	0.603085	0.552084		119	0.23919	0.541341		119	0.791285	0.498184
120	2.32049	0.0735737		120	0.086413	0.372526		120	1.58955	0.364922
121	1.37725	0.287046		121	1.03215	0.260151		121	0.903219	0.518557
122	0.752224	0.27585		122	0.538313	0.467172		122	0.489131	0.421317
123	1.40595	0.183155		123	1.86806	1.2392		123	0.699413	0.343407
124	0.487082	0.292853		124	0.643963	0.474779		124	0.629749	0.379438
125	0.79738	0.367259		125	0.603063	1.09311		125	0.790153	0.614819
126	2.49282	0.0661257		126	0.741917	1.15577		126	3.1721	0.352
127	0.550659	0.127249		127	0.248235	1.115		127	0.49396	0.349007
128	1.52121	0.944955		128	0.240521	0.366715		128	0.96951	0.542637
129	0.945978	0.170045		129	0.3692	2.35293		129	0.602669	0.645088
130	0.279446	1.88038		130	0.293279	3.88871		130	0.242651	1.28938
131	1.1174	0.375973		131	2.09472	2.26993		131	1.63583	0.75992
132	3.21234	0.580353		132	0.225914	0.941357		132	1.72478	0.37693
133	3.69432	0.189625		133	5.0939	0.75647		133	2.1956	0.451245
134	1.99446	0.612705		134	0.748985	0.706124		134	1.44166	0.530075
135	0.258383	0.502355		135	2.65413	0.539583		135	0.277316	0.687114
136	0.310311	0.824396		136	0.119762	0.625864		136	0.188886	0.813117
137	0.481747	0.263038		137	0.955745	0.341705		137	0.709784	0.671662
138	0.166117	0.314059		138	1.09254	4.08855		138	0.269882	0.664569
139	0.15913	0.393505		139	0.224701	0.572028		139	0.379975	0.434285
140	0.884726	0.280948		140	0.356086	1.80043		140	1.45636	0.663624
141	0.432912	0.225035		141	0.788363	0.624209		141	0.29193	0.406838
142	0.256978	0.143427		142	1.10625	0.702222		142	0.647381	0.263369
143	0.258696	2.59427		143	2.32085	2.14973		143	0.535607	2.87891
144	0.40605	0.501614		144	0.150875	1.09145		144	0.692208	0.713367
145	1.57809	0.689694		145	2.06115	5.26105		145	2.06874	1.41017
146	0.517452	0.142839		146	0.342527	1.35984		146	0.391995	0.328251
147	0.781802	0.433005		147	0.126116	0.978113		147	0.630209	0.763885
148	0.401767	0.541462		148	1.37236	0.545804		148	0.520888	1.00524
149	1.42732	0.771326		149	3.82519	1.45871		149	1.89651	0.441837
150	1.24309	0.869032		150	1.40778	0.211662		150	1.94191	0.834381
151	0.915291	0.299035		151	3.50084	4.35864		151	0.825283	0.363042
152	0.718774	1.79343		152	2.65707	0.811751		152	0.851882	2.32127
153	0.421195	1.86661		153	0.410276	1.09		153	0.585878	2.75927
154	1.13912	0.265368		154	0.661765	0.798939		154	1.87076	0.508682
155	0.322035	3.14628		155	0.426648	0.956554		155	0.764057	1.80676
156	0.157931	0.651447		156	3.2114	4.64098		156	0.405041	0.50996
157	1.87623	1.02744		157	0.959789	0.475802		157	1.54456	1.23899
158	0.187676	0.834589		158	0.982661	2.28139		158	0.362847	0.530575
159	0.306154	0.228611		159	0.542404	3.20295		159	0.524252	0.262917
160	1.181	0.464664		160	0.193235	1.22732		160	1.16707	0.415319
161	0.681739	0.996305		161	0.215112	0.605362		161	1.16745	1.14849
162	1.17169	0.460411		162	0.669981	0.848948		162	1.44917	0.414559
163	0.352879	0.237744		163	0.932166	15.4718		163	0.555854	0.582201
164	0.896141	0.826821		164	5.4114	1.15776		164	0.759889	0.757688
165	0.652199	1.44216		165	1.83192	0.647244		165	0.780637	0.700881
166	0.21846	0.332581		166	0.334204	1.50684		166	0.624632	0.399767
167	0.982317	0.749397		167	0.473248	0.594633		167	1.16712	0.813618
168	0.580385	0.614833		168	1.41293	1.4188		168	0.889587	0.769768
169	0.592152	1.33167		169	0.668393	2.30945		169	1.0067	1.50593
170	0.648151	0.75175		170	0.658026	0.823301		170	0.681023	0.694874
171	0.861778	1.20005		171	2.53813	2.96631		171	0.477811	1.25336
172	0.848587	0.391383		172	0.448702	4.67572		172	0.856032	0.670155
173	0.652593	0.514821		173	0.355462	1.45872		173	0.906311	0.724228
174	1.64122	0.380952		174	0.609083	1.07093		174	1.96437	0.65433
175	0.442914	0.389652		175	0.360041	0.565585		175	0.454639	0.613491
176	0.591817	0.537967		176	1.25094	1.88899		176	0.674933	0.544127
177	0.256401	1.65625		177	0.670255	0.445987		177	0.390627	1.36859
178	1.04126	2.83669		178	0.733079	1.40872		178	0.981847	2.80689
179	0.565908	0.270813		179	0.529297	0.761651		179	0.559608	0.561319
180	1.38403	0.53459		180	0.350155	5.08574		180	1.26351	0.761183
181	1.45594	0.329795		181	1.04134	0.423606		181	1.5184	0.433394
182	0.883186	0.387608		182	0.667591	0.690779		182	1.41892	1.24518
183	0.357006	1.57317		183	1.67493	0.394148		183	0.961726	1.38191
184	2.15291	1.49445		184	1.20693	0.980352		184	2.25245	2.18617
185	0.226542	1.13296		185	0.12316	2.18922		185	0.633437	2.59282
186	0.115559	0.328755		186	0.253793	0.509857		186	0.320934	0.339688
187	0.751897	1.71747		187	0.490309	2.16387		187	0.435879	1.23761
188	1.31518	0.71909		188	0.216258	0.310152		188	1.61772	1.39602
189	0.74079	1.38943		189	0.378668	1.17769		189	0.396548	1.9324
190	0.594055	0.714443		190	0.550433	0.566907		190	0.508066	1.20276
191	0.690817	0.120023		191	0.235584	1.11675		191	1.08304	0.503531
192	1.33097	0.0791384		192	0.270753	0.866182		192	1.52692	0.421221
193	1.46453	0.358279		193	-0.0618527	3.52819		193	1.38439	1.11555
194	1.74479	0.185828		194	2.05264	2.10418		194	1.79638	0.346608
195	2.71507	0.653845		195	0.234346	0.0638721		195	2.1096	0.443145
196	0.382589	0.476361		196	0.415575	0.102152		196	0.561427	0.398768
197	0.398744	0.27281		197	0.837099	1.2628		197	0.48577	0.447991
198	0.811003	3.31542		198	0.875365	1.05378		198	0.688298	2.68265
199	0.646397	0.201589		199	1.60245	0.173528		199	0.46917	0.647503
200	0.37108	0.977154		200	0.826024	0.826156		200	0.353978	0.977601
201	0.44224	1.47134		201	0.204055	1.39638		201	1.45032	0.839126
202	0.808661	0.540962		202	0.618622	0.488992		202	1.1398	0.526086
203	0.580657	1.17975		203	1.36774	1.55515		203	0.785198	1.79797
204	0.129471	2.91841		204	1.5688	0.361049		204	0.386125	3.34913
205	0.497123	0.495524		205	0.253905	1.08532		205	0.631198	0.452353
206	0.435167	0.172085		206	0.268024	0.428284		206	0.380436	0.294723
207	1.10486	0.267883		207	0.652121	1.16662		207	1.71443	0.841952
208	1.202	0.209849		208	3.47092	0.15129		208	1.22385	0.477232
209	0.0877147	0.231997		209	0.951853	0.355086		209	0.360529	0.82132
210	0.269204	0.110024		210	0.542424	1.38981		210	0.526105	0.291561
211	1.69656	0.512473		211	1.01781	0.484705		211	1.79755	0.623856
212	0.763539	0.632204		212	1.4866	0.344529		212	0.976428	0.382809
213	1.06098	0.688641		213	2.00952	3.71833		213	1.43108	0.734505
214	1.50854	2.35813		214	1.94018	0.2344		214	1.57126	1.71087
215	1.07292	0.314278		215	0.538276	0.480421		215	2.04852	0.678673
216	0.107657	0.20055		216	1.83433	1.37456		216	0.692716	0.381791
217	0.523356	0.389809		217	0.293758	1.50087		217	1.20776	0.461244
218	0.134134	0.366607		218	2.3213	0.15922		218	0.466673	0.375837
219	0.86053	0.531311		219	4.08926	0.63611		219	0.735758	0.850549
220	0.677327	1.21817		220	1.4351	1.7553		220	0.70874	0.794273
221	0.72618	2.75222		221	0.859007	0.833542		221	0.75158	1.27351
222	0.720847	0.323567		222	0.615629	2.32875		222	0.923298	0.435156
223	0.430098	1.29719		223	0.31003	2.84551		223	0.988753	1.28161
224	0.817738	1.17563		224	0.630224	0.857963		224	0.713207	1.39227
225	0.312245	5.44568		225	0.720894	0.416806		225	0.428692	4.48214
226	0.787304	3.87187		226	1.55078	2.1326		226	1.20144	4.34852
227	1.48085	0.158151		227	0.105117	0.795945		227	1.65304	0.54334
228	0.313815	1.78449		228	0.2461	1.73781		228	0.508912	1.48295
229	0.929286	0.276821		229	0.320156	2.28246		229	0.62667	0.430632
230	1.80894	0.536984		230	1.7049	0.988968		230	1.36844	0.502579
231	1.52608	0.444235		231	0.593941	2.26144		231	1.6997	0.507118
232	1.12437	1.48518		232	1.55316	2.31997		232	0.926668	1.28664
233	0.664328	-0.02523		233	1.27569	1.54488		233	0.875574	0.236572
234	2.0922	2.31215		234	0.230989	0.428756		234	2.03513	1.80936
235	1.25395	0.688208		235	0.876142	0.80628		235	1.90257	0.548864
236	0.331175	0.370605		236	0.0500454	0.471715		236	0.791766	0.792682
237	2.1652	1.64395		237	0.458218	0.620922		237	1.63928	1.83558
238	0.853767	2.07995		238	0.909667	0.343675		238	0.645569	1.56827
239	0.28784	0.762867		239	1.38069	0.516682		239	0.445198	1.20823
240	3.35642	1.29046		240	0.600028	0.239105		240	2.73651	1.78805
241	2.38562	1.06077		241	2.69153	1.92344		241	2.74252	1.77945
242	0.374654	1.19679		242	0.682328	0.62543		242	0.480738	1.13122
243	0.113429	1.14408		243	1.04948	0.877458		243	0.360404	1.99856
244	0.267771	0.856094		244	0.431984	1.04131		244	0.366141	0.682517
245	0.744391	0.336187		245	0.248903	0.747259		245	0.984096	0.479827
246	0.529846	0.59054		246	0.13349	0.907022		246	0.570546	1.12989
247	1.39088	0.938305		247	0.542054	0.400855		247	0.787672	1.39997
248	0.963403	0.309148		248	0.29889	0.902071		248	1.24354	0.658535
249	0.620508	0.517848		249	0.500976	0.635974		249	0.840606	0.381112
250	0.40565	0.296024		250	2.49699	0.564404		250	1.07867	0.778692
251	2.26434	0.417369		251	1.17813	0.659728		251	2.55369	1.00574
252	0.744984	0.115646		252	0.382782	1.44626		252	0.437983	0.400023
253	0.668957	0.465506		253	0.909986	1.09746		253	1.10194	0.487694
254	0.723247	0.851008		254	7.33941	1.16145		254	0.920767	1.25078
255	1.05245	1.03177		255	1.23177	0.775288		255	1.20539	0.95469
256	0.528297	0.219142		256	0.86874	2.71422		256	0.657479	0.418766
257	0.84705	0.318695		257	0.272865	0.345073		257	0.729573	0.465022
258	1.64891	1.4271		258	1.21151	0.735099		258	2.26549	1.32457
259	2.22885	0.864449		259	0.303232	6.11592		259	2.54634	0.920204
260	0.274383	0.407765		260	0.34366	6.66715		260	0.432348	0.517305
261	0.174936	0.327175		261	0.387013	6.2346		261	0.429508	0.294219
262	3.21928	0.487817		262	1.2729	3.52983		262	3.74515	0.501655
263	2.91923	0.410015		263	3.50606	1.41645		263	2.28421	0.519947
264	1.15314	2.35747		264	0.48358	4.23591		264	1.1628	2.51444
265	0.348316	0.257005		265	2.23458	1.06052		265	0.51032	0.437011
266	0.425492	1.00289		266	1.22733	0.486269		266	0.456447	0.843035
267	0.35318	1.56451		267	1.71642	0.336157		267	0.471311	1.81876
268	0.627902	5.46039		268	0.610803	1.60664		268	1.15375	6.90146
269	0.780841	1.53841		269	1.13917	0.576826		269	0.554704	2.97391
270	1.0011	1.14131		270	0.274253	1.84731		270	0.842143	1.4646
271	0.346151	1.56087		271	1.61664	0.451685		271	0.582099	2.07453
272	0.61898	0.430253		272	1.05512	0.478393		272	0.41796	0.483389
273	0.778998	1.12358		273	0.239178	1.32421		273	0.741733	1.47449
274	3.42978	0.681439		274	0.412802	0.495123		274	2.64558	0.663123
275	0.4362	0.38331		275	1.49667	0.851754		275	0.409216	0.392301
276	1.69344	0.91879		276	0.87074	0.377434		276	1.47598	1.4451
277	0.979422	0.872589		277	0.801687	1.86277		277	1.10958	1.33849
278	0.204219	0.153422		278	2.53361	3.65697		278	0.502036	0.335197
279	0.68	0.654987		279	0.911266	0.934648		279	0.681904	0.693198
280	0.402845	0.178468		280	0.184806	1.03175		280	0.399796	0.445573
281	1.9325	0.714932		281	1.19008	0.0338084		281	1.00537	0.309851
282	0.206465	0.357847		282	0.714419	0.331124		282	0.510858	0.502709
283	1.07289	0.320141		283	3.14584	0.708855		283	1.11511	0.540191
284	0.415414	0.841903		284	0.540262	1.65506		284	0.551855	2.31015
285	0.489925	0.783168		285	0.43263	0.924123		285	0.608652	0.566952
286	1.18166	0.688748		286	0.236455	4.0374		286	1.16826	1.00427
287	1.21306	0.664462		287	1.0562	1.14326		287	1.06054	0.716463
288	1.41179	1.1844		288	1.41239	6.66137		288	0.868222	1.21418
289	0.535958	0.181023		289	2.13624	0.481492		289	0.81541	0.701183
290	0.0921211	0.456702		290	0.872594	0.864368		290	0.387867	0.601133
291	0.471721	0.173423		291	0.25536	1.01065		291	0.71791	0.437579
292	0.213201	0.2088		292	3.81395	0.0502143		292	0.265124	0.291945
293	0.472915	0.788361		293	0.022577	1.30453		293	0.808203	0.360394
294	1.72206	0.803394		294	1.58295	1.63712		294	1.51574	1.43208
295	0.580278	0.133793		295	2.03197	2.16796		295	0.758233	0.320681
296	0.703341	0.158052		296	0.9456	2.70379		296	0.578703	0.392264
297	0.465431	0.253313		297	1.01106	1.07611		297	0.392193	0.39406
298	0.431888	0.72952		298	0.397778	0.411433		298	0.783497	0.610095
299	4.67089	0.0241793		299	1.34278	0.108019		299	4.44401	0.362867
300	0.26502	0.583079		300	1.48136	3.06232		300	0.435959	0.4958
301	1.19575	0.641698		301	0.328242	2.44346		301	0.912279	0.754715
302	0.547664	0.231368		302	1.41025	0.404429		302	0.749019	0.329467
303	1.73153	1.29285		303	0.0866362	0.23093		303	2.16468	1.65538
304	1.29295	0.490805		304	0.309358	2.86786		304	1.34114	1.19219
305	0.460329	0.100558		305	1.21214	1.17544		305	0.456471	0.627309
306	1.19816	0.179876		306	0.850339	1.61881		306	2.15937	0.463251
307	0.397846	0.366482		307	1.149	3.50501		307	0.765176	0.490324
308	0.794387	0.320736		308	0.62626	0.821974		308	0.834535	0.634814
309	0.684956	0.491426		309	0.119956	0.284773		309	0.607532	0.492804
310	2.01795	0.941842		310	-0.0259165	3.33968		310	2.05788	2.25026
311	0.430426	0.143651		311	0.412257	1.24448		311	0.569554	0.649177
312	0.958686	0.687072		312	0.183303	1.23103		312	0.870047	0.653256
313	0.860306	1.85435		313	0.805314	0.0885518		313	0.861615	2.23821
314	2.48545	0.99055		314	1.29601	1.25063		314	1.54337	0.775271
315	0.786226	0.554831		315	0.696387	0.875903		315	1.33877	0.637963
316	2.22828	0.152866		316	0.155776	1.82136		316	3.18852	0.640517
317	1.15081	0.545429		317	0.350533	0.581733		317	0.957096	1.27836
318	2.70342	0.927136		318	0.19037	1.38878		318	1.98539	1.42248
319	0.511117	0.591683		319	0.553914	0.621851		319	0.661842	0.623582
320	0.392158	1.21971		320	0.193282	0.400786		320	0.55246	2.61862
321	0.612137	0.23027		321	0.648062	0.383292		321	0.643748	0.372378
322	0.135491	0.46934		322	1.80607	2.7587		322	0.358624	0.398639
323	4.38531	0.773568		323	0.632675	0.750234		323	3.42078	0.79198
324	0.247742	0.274083		324	0.635079	1.54038		324	0.424345	0.771588
325	1.41063	2.34586		325	1.43268	1.39079		325	0.930888	1.56174
326	0.902899	0.943109		326	1.36882	2.27598		326	0.656387	1.688
327	0.609069	0.354569		327	0.163648	0.579573		327	0.537208	0.408795
328	1.21989	1.30667		328	1.05725	1.89597		328	1.04755	1.42005
329	0.718965	0.449306		329	1.9835	0.423687		329	0.629889	0.401202
330	0.54529	1.1002		330	1.24416	1.16104		330	0.751924	0.505085
331	0.0472272	0.439192		331	1.78427	0.239564		331	0.343068	0.517565
332	1.46155	0.0321054		332	1.04411	0.232455		332	2.0067	0.403312
333	1.31778	0.48821		333	3.0691	5.8203		333	1.49696	0.427241
334	0.2356	0.660167		334	3.47504	2.99801		334	0.297471	0.617766
335	0.43056	0.0905231		335	0.814936	0.874862		335	0.643125	0.382136
336	0.297244	1.76224		336	-0.0235167	2.69935		336	0.725768	1.99134
337	1.82667	2.14343		337	2.18359	0.699633		337	2.52123	3.60234
338	0.710343	0.715416		338	2.79211	1.53004		338	0.638112	0.773134
339	0.469164	0.466291		339	0.45117	1.11143		339	0.583633	0.611073
340	2.08418	0.0556329		340	1.89356	0.779694		340	2.32817	0.342941
341	1.34684	0.325301		341	1.0192	1.24776		341	1.14183	0.297431
342	1.11827	0.745083		342	1.8791	1.6981		342	0.983761	0.829662
343	1.27246	0.282054		343	1.41434	0.128621		343	1.32409	0.39043
344	0.723259	0.506707		344	3.04508	1.11198		344	0.546695	0.351132
345	1.69302	1.70147		345	0.621391	1.89258		345	1.75788	1.24747
346	0.346213	0.444637		346	0.325402	0.72253		346	0.508235	0.951154
347	1.26996	0.336642		347	1.43118	3.81304		347	1.37356	0.308376
348	0.579361	3.72393		348	2.01561	1.08914		348	0.544113	4.39517
349	2.52715	0.681931		349	0.880078	0.959893		349	2.10661	1.28197
350	0.129467	1.05561		350	0.202238	2.30423		350	0.242341	1.42299
351	0.78345	0.490175		351	1.11379	0.656614		351	0.732638	0.606768
352	0.616012	0.216256		352	1.19535	2.34253		352	0.644246	0.411987
353	1.63443	2.16042		353	0.775727	1.21111		353	1.2018	4.20834
354	0.746449	1.24842		354	0.278258	0.224753		354	0.759292	1.06025
355	1.01189	0.249302		355	2.23018	0.188943		355	1.1504	0.309521
356	0.425841	0.149194		356	0.414332	1.98896		356	0.584579	0.255315
357	0.662083	0.202487		357	0.491738	2.83105		357	0.72895	0.420905
358	0.506089	0.548263		358	0.674172	1.95414		358	0.874088	0.871131
359	0.250179	1.05115		359	0.369058	1.47186		359	0.467875	1.24979
360	0.959161	0.711886		360	2.33575	1.67607		360	1.67535	1.1431
361	0.818849	0.838825		361	3.51154	1.20723		361	0.864572	1.09433
362	0.579674	1.17884		362	1.29366	0.200036		362	0.631494	1.41526
363	0.224751	0.256638		363	0.523231	2.05867		363	0.645114	0.743288
364	0.44247	0.710058		364	0.518521	1.34865		364	0.536364	0.745218
365	0.699821	3.10636		365	4.35892	0.451607		365	0.307785	2.99555
366	1.08444	0.290096		366	0.0696108	0.94686		366	0.82881	0.603024
367	0.250244	1.3349		367	0.772431	2.60901		367	0.575223	1.07928
368	3.57811	0.690005		368	1.92175	0.804428		368	2.76795	0.758215
369	1.37872	3.40532		369	0.697842	0.715684		369	1.78074	3.47412
370	1.09221	0.801154		370	1.07424	0.610927		370	1.64169	1.10943
371	1.87999	1.89618		371	1.50966	0.445318		371	1.30147	2.66086
372	0.280208	0.139103		372	1.20895	0.975224		372	0.487763	0.350184
373	0.589673	0.104301		373	1.83085	0.981158		373	0.45524	0.50167
374	0.400309	0.279485		374	1.41666	0.398588		374	0.368605	1.10676
375	1.02755	0.586706		375	0.222883	1.73338		375	0.967175	0.467317
376	0.346433	0.394356		376	0.355751	0.872582		376	0.806658	0.384571
377	0.255613	0.571595		377	0.669975	0.760056		377	0.56368	1.37365
378	0.688469	0.45956		378	0.265232	0.308739		378	0.429735	0.397644
379	0.418662	0.0492304		379	0.147293	2.58366		379	0.54764	0.384946
380	0.415719	0.604697		380	0.202189	1.37152		380	0.42793	0.707105
381	0.554253	0.568145		381	0.584739	3.38102		381	0.596515	0.668495
382	0.577629	1.06977		382	3.99339	1.88989		382	0.201126	0.79264
383	0.131845	1.36193		383	0.176241	1.53718		383	0.294161	1.00918
384	0.44245	0.861542		384	0.419051	0.916704		384	0.462812	1.55164
385	1.04628	0.24239		385	0.56337	0.679438		385	1.35283	0.370275
386	0.935514	0.929962		386	2.63605	0.388176		386	1.00989	1.01798
387	0.749006	0.107064		387	0.794546	0.321108		387	0.652879	0.341996
388	0.440109	1.79757		388	1.1004	1.38039		388	0.659836	1.65304
389	0.491114	2.08136		389	1.38242	0.49143		389	0.462189	2.379
390	-3.66478e-06	1.11801		390	1.43212	1.36278		390	0.205684	1.39993
391	1.30251	-0.00793873		391	0.114705	0.179876		391	0.963991	0.229504
392	0.811758	1.13398		392	0.863801	1.9171		392	0.770503	1.38257
393	0.477066	0.49125		393	0.893538	0.949222		393	0.747789	0.50602
394	0.633478	0.233398		394	1.43806	0.0572209		394	0.507751	0.255433
395	0.890347	1.58534		395	2.15945	0.453441		395	0.721204	1.81773
396	0.363762	0.105262		396	1.50126	1.11162		396	0.924824	0.183561
397	0.617436	0.103306		397	1.68798	0.520178		397	0.440031	0.416509
398	2.06152	0.150163		398	0.819966	0.406544		398	2.04313	0.459313
399	2.36522	0.256747		399	0.793153	0.573389		399	1.93251	0.476217
400	0.837687	1.08992		400	-0.00680894	1.74563		400	0.465578	1.31335
401	4.33285	1.11027		401	1.28294	0.452659		401	5.18424	0.946889
402	2.15781	0.596228		402	2.51699	0.863388		402	2.2956	1.14964
403	2.65367	0.536946		403	0.21764	0.990112		403	2.16317	0.909983
404	0.431975	0.296336		404	2.58802	0.613129		404	0.331504	0.455626
405	2.31835	0.17624		405	3.73929	0.446572		405	2.74592	0.332302
406	0.400828	0.242207		406	2.22841	0.401267		406	0.547282	0.444785
407	1.21578	0.937028		407	1.82493	0.493936		407	0.658209	1.70778
408	2.5706	0.176312		408	0.607535	0.445931		408	3.27532	0.4686
409	1.23995	0.110344		409	1.21149	0.312049		409	0.58769	0.441915
410	0.278592	1.07352		410	0.641992	1.24857		410	0.305631	0.857354
411	1.5777	0.541444		411	0.799647	1.33739		411	1.61765	0.569457
412	1.37738	0.756728		412	0.703954	1.22794		412	0.874536	0.441404
413	0.81507	1.07729		413	0.462898	1.01329		413	0.968063	1.17164
414	0.491378	1.02788		414	0.651569	0.939014		414	0.43277	1.29137
415	1.49165	0.978075		415	0.520224	0.78015		415	1.28528	0.646701
416	0.464858	0.355338		416	1.12165	0.184164		416	0.545724	0.324287
417	0.586407	1.46674		417	0.243902	0.319334		417	1.00596	1.11076
418	0.594476	0.65536		418	0.38398	1.16177		418	0.482471	1.20363
419	1.48839	0.279574		419	1.4072	1.82887		419	0.969905	0.312297
420	0.911012	0.0427123		420	0.197257	0.474867		420	0.774578	0.337805
421	0.843117	0.685593		421	0.530483	0.58469		421	1.15597	1.08871
422	0.516273	0.879759		422	0.487979	0.497008		422	0.475248	0.446781
423	0.39315	0.266697		423	0.117633	0.380379		423	0.340066	0.411162
424	0.340324	1.25059		424	0.38621	0.850101		424	0.538697	1.62845
425	0.197902	0.931924		425	0.0174104	4.24588		425	0.694503	1.61926
426	0.795761	0.248097		426	1.35026	0.462198		426	0.74386	0.315193
427	1.86467	0.116385		427	0.519959	0.455968		427	1.69613	0.48342
428	0.897307	0.439769		428	1.49519	2.98345		428	0.954552	0.447841
429	0.693004	0.730351		429	2.07141	0.141263		429	0.681117	0.409761
430	2.24829	0.456504		430	2.05399	0.606967		430	1.57919	0.462404
431	0.815917	0.875375		431	1.35292	0.617642		431	0.441981	1.3896
432	0.897255	0.458509		432	0.896917	2.66141		432	0.485018	0.500095
433	3.13335	0.336793		433	1.00222	0.618362		433	2.41867	0.490271
434	1.52461	0.220298		434	0.106865	2.29007		434	1.24963	0.446483
435	1.06969	1.83109		435	0.203708	1.60311		435	1.13421	2.44954
436	0.0834357	0.253906		436	0.426693	8.07095		436	0.399464	0.481166
437	2.34193	0.341334		437	0.367798	0.541575		437	2.8665	0.410573
438	0.521904	0.517756		438	0.0763194	0.374467		438	0.555568	0.302251
439	0.592703	0.309471		439	0.419369	2.43379		439	0.458718	0.347457
440	0.86104	0.505016		440	1.00189	0.761093		440	0.626641	0.66
441	1.0106	0.439159		441	0.503654	2.61935		441	0.778236	0.415804
442	0.377599	1.43539		442	1.89452	1.23928		442	0.425616	1.52839
443	1.35528	0.231844		443	1.44255	0.956001		443	1.02901	0.314796
444	1.08599	0.453445		444	0.663237	0.927857		444	1.33295	0.57243
445	0.311318	1.8157		445	0.570947	0.221701		445	0.356528	1.8002
446	2.32441	1.11589		446	1.5603	0.641858		446	2.26938	0.944067
447	1.01045	0.587063		447	0.622389	0.780504		447	1.01293	0.365808
448	0.0867026	1.69412		448	0.371024	0.788624		448	0.252855	2.49175
449	1.61151	0.267384		449	1.67396	0.333767		449	1.16754	0.538645
450	0.262048	1.58361		450	1.2166	0.708289		450	0.562637	1.58059
451	0.392176	1.5698		451	0.269712	0.428455		451	0.549639	1.79598
452	0.568701	1.23606		452	1.72577	0.296227		452	0.430024	0.812615
453	1.34958	0.36571		453	0.161159	0.895109		453	1.44035	0.663461
454	0.343394	0.205863		454	1.81775	0.202105		454	0.372981	0.606305
455	0.647498	0.862201		455	0.171162	1.82493		455	0.922607	0.716734
456	0.534226	0.72869		456	0.0343645	1.80006		456	0.417746	0.72944
457	1.793	1.449		457	0.224851	2.07274		457	1.59843	1.2699
458	2.62693	0.228879		458	0.387393	2.20016		458	1.81424	0.21325
459	0.133162	0.840173		459	0.52522	2.61279		459	0.394479	1.23711
460	4.09238	0.639592		460	0.498928	0.44344		460	2.5934	0.77926
461	4.85518	0.288622		461	0.568799	2.84751		461	3.3885	0.599975
462	0.750572	0.921922		462	1.35438	1.00091		462	0.892078	0.571414
463	1.74363	0.578892		463	1.74812	1.4543		463	1.49024	0.376161
464	0.488889	0.144997		464	0.403862	0.362366		464	0.487845	0.430995
465	1.90556	0.67182		465	0.102049	2.31455		465	1.66297	1.02634
466	0.894658	0.306067		466	0.516074	1.05813		466	0.685075	0.343173
467	0.318933	1.695		467	2.26324	0.434952		467	0.680899	1.42637
468	0.629024	0.184133		468	1.05238	2.16486		468	0.497314	0.389434
469	2.04064	1.2446		469	0.499396	1.26397		469	1.57072	1.10668
470	0.270176	0.577443		470	1.1958	0.488223		470	0.380326	0.816852
471	0.470293	0.509129		471	0.387576	1.33635		471	0.372073	0.48667
472	0.499788	0.876117		472	0.56848	0.831005		472	0.418976	0.707459
473	0.794396	0.622707		473	2.13394	1.38092		473	0.90116	0.796304
474	1.53169	4.15246		474	0.369916	0.615871		474	0.788776	2.65396
475	0.496327	1.78002		475	0.0948051	1.14839		475	0.485204	1.24432
476	2.32045	0.928269		476	0.33192	0.560292		476	2.42341	1.36508
477	1.26393	0.268684		477	0.45209	0.388468		477	0.916382	0.697744
478	1.82958	0.561936		478	0.44057	0.434534		478	1.60202	0.40827
479	4.34319	1.73885		479	0.14692	1.57845		479	2.95611	1.46596
480	0.457602	0.156235		480	0.447356	0.591153		480	0.399769	0.356157
481	0.419226	0.200165		481	0.160558	0.623491		481	0.46033	0.600746
482	0.410699	0.0758017		482	0.72198	0.702271		482	0.464505	0.358083
483	1.35915	0.264056		483	0.493864	0.434963		483	0.994674	0.580463
484	1.56458	0.372931		484	0.317287	0.216981		484	0.900858	0.330267
485	3.80355	0.6205		485	0.549342	0.150422		485	3.19047	0.489031
486	2.00187	0.653625		486	0.370973	0.689314		486	1.8565	0.587397
487	0.316904	0.889626		487	0.369203	0.199333		487	0.994363	0.945234
488	0.711499	0.25995		488	1.5393	0.404304		488	0.635314	0.532456
489	1.37449	0.292236		489	0.136454	0.167302		489	1.25009	0.598584
490	0.720325	0.301701		490	0.00915713	0.747303		490	0.843565	0.444497
491	0.921168	0.425436		491	0.470277	5.02809		491	1.12284	0.796481
492	0.732476	0.276874		492	1.11849	1.2659		492	1.59933	0.581349
493	0.233134	0.175864		493	0.374889	0.383397		493	0.391769	0.612727
494	0.970756	0.435797		494	0.711049	0.219018		494	1.22638	1.34615
495	1.45818	0.460885		495	0.912469	2.99872		495	1.13963	0.760834
496	0.461698	0.545328		496	0.106004	0.727707		496	0.52417	1.89509
497	0.732068	0.318161		497	0.332368	0.583338		497	0.42408	0.306336
498	1.65162	0.487187		498	0.154209	0.610225		498	1.57262	0.784045
499	0.619857	0.691207		499	3.40774	0.564412		499	1.02096	0.807502
500	0.786441	0.834656		500	0.201528	1.30548		500	0.608804	0.908369
501	0.284333	0.0441483		501	1.07008	0.58107		501	0.512828	0.346441
502	0.592909	0.463979		502	0.677729	0.522606		502	0.472464	1.49551
503	1.06301	0.334029		503	0.0593961	2.64012		503	1.50455	0.790542
504	0.538728	2.1413		504	0.395708	1.03676		504	0.568219	3.34523
505	1.72717	1.12583		505	0.230539	0.276987		505	1.66329	1.38205
506	0.309902	0.270495		506	0.768743	1.14551		506	0.385213	0.62676
507	1.87075	0.520856		507	0.414232	0.498823		507	1.62949	0.481929
508	0.406288	0.611785		508	0.252258	0.386314		508	0.307305	1.2547
509	0.945848	0.674811		509	0.352213	0.0934635		509	0.942121	0.865698
510	0.684059	1.05644		510	0.800932	0.0587776		510	0.562448	1.37914
511	0.356884	0.327949		511	0.103244	0.284896		511	0.535686	0.442978
512	1.51622	0.182776		512	2.01173	0.861694		512	0.750765	0.595393
513	1.17707	1.74931		513	0.857464	0.306482		513	0.855947	1.57053
514	0.482549	0.564106		514	1.32043	2.59909		514	0.745609	0.888141
515	0.134488	0.272158		515	1.5663	0.0415106		515	0.252088	0.376941
516	0.83565	0.112473		516	1.09626	0.23823		516	0.845694	0.438396
517	0.669118	0.300097		517	1.77417	0.68938		517	1.82759	0.308302
518	0.420843	0.41815		518	0.74792	0.565087		518	0.373863	0.483425
519	1.36098	0.351177		519	2.68079	1.11635		519	1.44484	0.483293
520	0.941124	0.326236		520	0.396498	0.169035		520	0.609369	0.585755
521	0.533641	0.236008		521	0.586317	0.0230418		521	0.43002	0.360781
522	0.197478	0.0705097		522	0.53329	0.276689		522	0.454582	0.471878
523	0.3411	2.26642		523	0.249024	0.856921		523	0.64422	2.29841
524	1.56136	0.297364		524	0.979823	1.25633		524	1.6274	0.714799
525	0.766966	0.20805		525	0.0684272	0.463569		525	0.983227	0.462965
526	0.980049	0.186464		526	0.487321	0.79107		526	1.21294	0.433064
527	1.05589	2.36874		527	0.699101	0.139585		527	1.14147	3.44145
528	0.676607	0.409532		528	0.856455	1.14219		528	0.585114	0.522433
529	3.81561	0.823274		529	0.137546	0.097604		529	3.70521	0.841973
530	0.29155	0.0337593		530	0.497759	3.79403		530	0.453111	0.181629
531	0.932638	0.679368		531	1.21315	0.530201		531	0.976556	1.03444
532	0.853987	0.770449		532	0.125241	1.85144		532	1.32899	1.07533
533	0.446619	0.564275		533	0.399799	1.55718		533	0.449357	0.724629
534	0.683431	0.36521		534	1.48142	0.277313		534	0.747259	0.908611
535	1.40008	0.228404		535	0.51397	0.24758		535	1.62456	0.550247
536	1.04513	0.597543		536	0.0218057	0.316335		536	1.17079	0.785376
537	0.416561	0.409847		537	1.06742	0.244802		537	0.677713	0.605656
538	1.47421	0.116601		538	0.508141	1.53357		538	1.99559	0.732733
539	2.98005	0.269991		539	0.225828	0.437074		539	2.19506	0.350212
540	0.647908	0.226914		540	0.955247	0.177795		540	0.498064	0.529966
541	0.6942	0.337535		541	0.697823	1.315		541	0.37866	0.652845
542	0.902733	2.81396		542	0.15917	1.05497		542	0.84172	2.4592
543	0.659449	0.26237		543	0.56888	1.42801		543	0.369252	0.448417
544	0.541499	0.292958		544	0.860562	0.626819		544	0.507247	0.534147
545	0.460425	0.244903		545	0.065646	0.445561		545	0.42643	0.733573
546	0.15821	0.373085		546	0.752748	0.0149963		546	0.358465	0.473713
547	1.08279	0.250903		547	0.712191	0.752595		547	1.6246	0.6296
548	1.43703	2.18557		548	0.959268	0.139927		548	1.51096	2.10622
549	1.8607	0.57345		549	0.880107	0.338067		549	0.946381	0.935308
550	1.33206	0.378438		550	1.02317	0.527084		550	1.54805	0.462636
551	0.938465	1.11382		551	0.609512	0.224103		551	0.991155	1.15524
552	0.193939	0.469025		552	1.20364	0.169739		552	0.392437	0.609704
553	0.247942	0.0852843		553	0.947977	0.191139		553	0.578394	0.377235
554	0.226592	0.349161		554	5.68711	0.158501		554	0.661869	0.545437
555	0.744686	0.35303		555	1.06646	1.6861		555	1.0776	0.533327
556	2.21106	0.151752		556	0.266228	0.480259		556	1.53252	0.353858
557	0.687711	2.38371		557	0.401277	1.09801		557	0.620022	2.59174
558	0.665148	1.17101		558	0.146568	0.142171		558	0.780317	2.30137
559	2.25479	1.07435		559	0.225005	0.420773		559	1.63399	1.13676
560	0.531241	0.215799		560	0.928049	0.0640815		560	0.683353	0.522958
561	0.527	2.29053		561	0.529221	0.301432		561	0.583456	2.30826
562	0.158767	1.66932		562	1.83112	0.351113		562	0.323413	1.40501
563	0.146726	0.380989		563	2.41089	2.90188		563	0.387287	0.629282
564	1.44075	0.51101		564	0.458276	0.301447		564	1.77507	0.72958
565	1.54073	1.44571		565	0.512427	1.07452		565	0.924885	1.52049
566	1.52069	0.305478		566	5.67665	1.64299		566	1.31717	0.409236
567	0.154453	0.307981		567	1.35509	0.479753		567	0.25058	1.06988
568	1.7416	0.736449		568	3.40757	0.271347		568	1.34801	0.575542
569	0.562965	0.457487		569	0.484246	0.80678		569	0.590798	1.27098
570	1.41544	2.11605		570	0.475711	0.740935		570	1.56311	3.5449
571	0.44105	0.512582		571	1.25912	1.14226		571	0.454523	0.980007
572	1.38226	0.187434		572	0.385385	3.02013		572	1.35047	0.457907
573	0.426208	1.88288		573	3.51172	0.144286		573	0.584065	2.6858
574	0.505837	0.141069		574	0.530781	0.418879		574	0.729863	0.589253
575	1.69214	1.19338		575	1.33532	0.56306		575	1.50385	1.13343
576	0.460033	1.03573		576	0.735347	3.04392		576	0.450444	0.85677
577	0.182525	0.384928		577	1.32751	0.438714		577	0.416468	0.369413
578	1.10453	0.496177		578	0.189475	2.1937		578	1.01706	0.667566
579	0.188775	0.0796827		579	2.22468	0.782391		579	0.251473	0.29845
580	2.6791	0.299626		580	0.406294	1.47987		580	2.68208	0.415601
581	0.610539	0.410974		581	0.103751	0.16498		581	1.08885	0.521191
582	0.729971	0.392392		582	4.82633	0.234837		582	0.762234	0.347931
583	0.252201	0.414874		583	0.736604	0.805473		583	0.406962	0.407884
584	0.466333	0.19105		584	1.54504	1.1155		584	0.439115	0.420513
585	0.32543	1.85329		585	0.532079	0.669441		585	0.489874	3.03777
586	2.56198	1.25238		586	2.10215	0.421207		586	1.51487	1.23607
587	0.931341	0.399298		587	1.10785	0.809469		587	0.798031	0.488068
588	0.720979	0.948848		588	0.689102	0.706848		588	0.916098	0.721379
589	1.03861	0.840613		589	0.227504	0.62801		589	1.19329	0.70128
590	0.374844	1.64422		590	1.27342	0.280921		590	0.818754	1.47204
591	1.21737	0.548458		591	3.5941	0.21066		591	1.20464	0.403069
592	0.741435	0.296194		592	0.704821	0.304972		592	0.625638	0.255674
593	0.909316	0.17918		593	0.329317	0.160923		593	1.22632	0.661114
594	0.760504	0.595321		594	0.294363	0.486152		594	0.583534	0.744259
595	0.566701	1.0652		595	0.210472	2.6546		595	1.13668	1.02157
596	0.34092	0.763736		596	1.16736	0.667121		596	0.476809	0.71229
597	0.398748	0.503784		597	3.98262	2.07423		597	0.583528	0.696253
598	2.27961	0.415022		598	1.01954	0.663167		598	1.66365	0.733402
599	0.472866	1.17372		599	0.0986879	0.195664		599	0.663883	1.91888
600	0.639626	0.531777		600	0.346159	2.60373		600	0.969636	0.61639
601	0.533851	0.301803		601	0.350529	0.58331		601	0.357932	0.688
602	0.69398	0.131082		602	1.66208	0.407628		602	0.81366	0.340583
603	1.34297	0.490015		603	1.20368	1.53606		603	1.013	0.776679
604	1.1805	0.263147		604	1.00908	0.257074		604	1.80849	0.429731
605	2.36604	0.321499		605	1.07732	0.526103		605	1.58675	0.802355
606	0.815772	0.527993		606	3.32726	0.302552		606	1.01274	0.571384
607	0.105175	0.985527		607	0.743078	0.893803		607	0.295621	0.965058
608	0.369374	1.24618		608	0.797786	0.990733		608	0.305771	1.91536
609	0.255793	0.437869		609	0.762388	0.68506		609	0.433454	0.640125
610	1.00548	1.38307		610	0.399709	0.572469		610	1.61366	1.14371
611	0.328954	0.327369		611	0.727342	0.575426		611	0.602974	0.621066
612	0.0477823	0.159188		612	0.82673	0.521278		612	0.295214	0.396266
613	0.538489	1.3487		613	0.414213	1.10008		613	0.805101	2.40409
614	0.153682	0.150284		614	1.10963	0.254958		614	0.306029	0.324151
615	2.10182	0.187193		615	1.22215	2.0042		615	2.25634	0.295444
616	0.558163	0.281824		616	0.0740862	0.288133		616	0.853338	0.796257
617	0.688413	0.495896		617	3.67346	0.727894		617	0.654939	0.98197
618	1.07923	0.841161		618	0.439992	0.438716		618	1.16459	1.39467
619	2.20974	1.31316		619	0.50081	1.0369		619	2.59843	1.69966
620	0.873158	0.2935		620	1.01972	0.389589		620	0.634988	0.336302
621	1.59086	1.07552		621	0.0880111	1.45657		621	2.75604	2.33667
622	0.779451	0.271599		622	3.73746	0.612762		622	0.869279	0.316804
623	0.254979	0.478096		623	0.236337	0.681101		623	0.348361	0.655018
624	0.307106	0.392455		624	0.400085	0.742609		624	0.75658	0.74411
625	0.701411	1.26025		625	0.365611	0.358873		625	0.578641	1.50138
626	0.424064	0.430148		626	0.20879	0.489756		626	0.38746	0.305032
627	0.768918	0.507696		627	0.6916	1.77275		627	1.01583	0.938426
628	0.343081	1.54988		628	0.780018	0.306756		628	0.375393	1.26401
629	0.289203	1.46227		629	1.5619	1.32236		629	0.451872	2.04061
630	0.259789	0.243072		630	3.88972	0.754748		630	0.499113	0.454645
631	0.212124	0.318449		631	1.33959	0.558575		631	0.504684	0.498794
632	0.546134	0.310839		632	0.147334	1.56453		632	0.668362	0.528508
633	2.59033	0.123814		633	3.31561	1.21319		633	2.18591	0.354262
634	0.353447	1.15567		634	1.97876	0.0256927		634	0.628305	0.965233
635	0.587517	0.382142		635	2.12296	1.4692		635	0.220067	0.505523
636	1.36336	1.01243		636	1.45857	0.383507		636	0.973903	1.69285
637	1.49944	0.641129		637	0.979057	0.409814		637	1.57119	1.10006
638	0.816407	0.918421		638	0.334536	0.696359		638	1.36551	1.2429
639	0.377913	0.412056		639	0.749314	0.106736		639	0.411617	0.486902
640	2.27318	0.0763705		640	1.99094	0.456166		640	1.62144	0.254744
641	0.809089	0.39888		641	1.29536	1.39235		641	1.26338	0.664166
642	0.881518	0.284269		642	1.3795	0.196415		642	1.59143	0.516085
643	2.17495	0.118747		643	1.20073	0.654264		643	2.44093	0.395509
644	0.51603	0.0142986		644	1.56637	1.46639		644	1.00525	0.24483
645	0.619228	0.544125		645	0.928806	0.535498		645	0.714814	0.426381
646	0.912298	2.31906		646	1.00285	0.623568		646	1.08826	2.81342
647	0.189466	0.122672		647	6.54645	0.297604		647	0.63394	0.43536
648	0.469756	0.451484		648	0.467532	0.554963		648	0.447797	0.60773
649	0.317357	0.0185218		649	0.354014	1.24429		649	0.461201	0.672481
650	0.999136	0.374837		650	0.748615	1.66832		650	1.154	0.328216
651	0.450848	0.533855		651	1.62736	0.473033		651	0.421545	0.949641
652	0.971156	0.974965		652	1.18724	0.113874		652	0.855815	1.83981
653	1.44355	0.351986		653	0.207778	0.189989		653	1.22414	0.698275
654	0.283288	0.222934		654	1.44661	0.61885		654	0.422749	0.8751
655	1.42346	0.903989		655	0.377254	0.413464		655	1.53132	2.39826
656	0.870123	0.16753		656	1.22028	0.563318		656	1.02183	0.280402
657	0.90852	0.0896016		657	0.417182	0.644338		657	1.38854	0.308068
658	1.55373	0.177553		658	1.10266	0.739852		658	1.47103	0.45186
659	2.27372	1.45258		659	2.03491	1.15129		659	1.54154	1.60074
660	0.451563	0.492033		660	1.27132	0.824718		660	0.264053	0.593368
661	2.44318	1.28799		661	1.43351	1.39267		661	1.56243	1.83084
662	0.469491	0.868315		662	2.48612	1.18427		662	0.930747	1.15627
663	3.87269	0.394999		663	0.77723	0.401181		663	3.13302	0.370286
664	0.187915	0.258609		664	0.852141	1.84375		664	0.288767	0.344359
665	1.75339	0.0987839		665	0.443149	0.701022		665	2.52167	0.371916
666	4.0827	1.33244		666	0.408224	0.815906		666	3.8811	1.22878
667	1.9624	1.8158		667	0.593184	2.88445		667	1.92226	2.00222
668	3.08029	0.563505		668	0.714497	0.228021		668	2.5683	0.64601
669	0.923342	0.0580658		669	5.22644	0.96782		669	1.43166	0.273488
670	0.175138	0.832546		670	3.22602	1.00264		670	0.454382	0.897756
671	0.890663	0.186684		671	0.47228	0.870376		671	1.41014	0.299197
672	1.71828	0.300182		672	0.419263	0.276299		672	2.35832	0.598551
673	0.0188678	0.909288		673	4.01883	0.490652		673	0.325308	1.01363
674	0.893443	0.808177		674	0.304207	0.347855		674	0.978451	1.2347
675	3.10237	0.220726		675	1.03064	0.00109262		675	2.33432	0.399101
676	0.424459	0.549734		676	0.633337	0.612246		676	0.662484	0.446389
677	0.668677	0.664995		677	0.958774	0.132852		677	0.658499	0.739427
678	0.375274	0.132201		678	6.29303	1.09167		678	0.600906	0.207884
679	0.227812	0.785586		679	2.79227	0.22067		679	0.384427	1.51716
680	0.569611	0.175681		680	0.101838	0.720282		680	0.454991	0.376595
681	0.205311	0.624924		681	1.29309	0.250729		681	0.580205	0.7788
682	0.597492	0.502124		682	0.216532	2.88109		682	1.30915	0.817545
683	0.817683	0.797791		683	0.135546	0.163869		683	0.700198	0.659217
684	0.90306	0.214795		684	0.544173	1.0831		684	1.24459	0.505714
685	1.96769	0.331868		685	0.113343	0.403202		685	2.5784	0.609981
686	0.379552	0.370264		686	0.462672	0.193604		686	0.528054	0.528483
687	0.28731	0.93353		687	0.216161	1.1305		687	0.300868	1.15413
688	0.356786	1.51846		688	1.90446	0.470716		688	0.447799	1.13873
689	0.915724	0.765073		689	0.415322	0.83257		689	1.04147	1.05513
690	1.02063	0.889569		690	1.20395	0.399248		690	1.72415	1.47431
691	1.99737	1.15428		691	0.203883	1.32655		691	2.29648	0.988694
692	0.348061	0.643336		692	0.965727	0.662265		692	0.423063	0.513885
693	0.885783	0.725935		693	0.394532	3.54248		693	0.602791	1.06765
694	0.274095	0.394495		694	0.249053	0.19535		694	0.455459	0.439338
695	0.379711	0.474482		695	0.898389	0.503032		695	0.53562	0.445036
696	1.12942	0.412974		696	0.304496	0.298186		696	0.930537	0.681414
697	1.3861	0.530035		697	0.521758	1.70698		697	1.99578	1.05841
698	0.937529	0.281953		698	0.727691	1.2034		698	1.13119	0.460725
699	0.322039	0.192898		699	0.195979	1.62693		699	0.49635	0.862571
700	0.678605	1.46831		700	1.64833	2.86554		700	0.534942	1.32959
701	0.628066	0.229		701	0.378748	0.791051		701	0.505199	0.397684
702	0.14738	1.15186		702	0.346825	1.05167		702	0.482646	1.42477
703	0.23106	0.823839		703	0.717273	2.16786		703	0.365645	0.782209
704	0.119489	0.518711		704	2.23551	1.20537		704	0.344079	0.467533
705	0.59267	1.17558		705	2.67017	0.737013		705	0.845144	1.02245
706	5.02484	0.272336		706	1.82167	0.130335		706	4.38203	1.21175
707	0.378962	0.954052		707	0.6196	0.452383		707	0.593684	1.41727
708	0.916946	0.429758		708	0.265957	0.218296		708	0.601956	0.61672
709	1.266	0.167557		709	1.31716	0.778552		709	1.29952	0.308009
710	0.460032	0.333803		710	0.647395	1.11611		710	0.461338	0.565226
711	0.618707	0.327964		711	0.44042	1.25529		711	0.61815	0.388858
712	1.56339	0.64507		712	1.08039	1.92903		712	1.55378	0.847609
713	0.188394	0.703771		713	0.559102	0.385575		713	0.346919	0.578348
714	0.413153	0.528988		714	0.559848	0.144015		714	0.678688	0.472465
715	0.500679	0.931118		715	0.602001	0.624384		715	0.931208	1.06993
716	1.05103	0.297776		716	1.10378	0.405383		716	0.61246	0.358734
717	0.754672	0.273187		717	0.474373	0.966688		717	1.41478	0.822031
718	0.677362	2.02136		718	0.371086	0.907879		718	0.677985	2.70774
719	1.09623	0.407644		719	0.663522	0.263235		719	1.21946	1.13849
720	1.80531	0.258483		720	0.466012	1.04286		720	2.5226	0.462536
721	0.762126	0.0659286		721	2.1563	0.185152		721	0.734515	0.390745
722	2.80608	0.36422		722	1.49241	0.67238		722	1.86305	0.684932
723	0.230381	0.141985		723	1.92109	1.23073		723	0.513631	0.355458
724	0.113264	0.754282		724	1.08369	0.556743		724	0.370739	0.703433
725	1.87781	0.925569		725	0.4463	0.742995		725	2.73888	0.767539
726	3.35572	1.16383		726	0.425321	0.831442		726	2.59997	1.30452
727	0.491426	0.591238		727	0.0261016	0.844655		727	0.873021	0.868988
728	1.62981	0.201196		728	0.368055	0.64656		728	1.74682	0.583218
729	0.9848	0.782068		729	1.71646	0.712999		729	0.860118	0.951183
730	1.43767	0.281281		730	1.26336	0.199839		730	2.34692	0.846488
731	1.90925	0.592215		731	2.735	1.60802		731	1.74207	0.834849
732	0.417952	0.655154		732	0.524983	1.08921		732	0.946016	0.971529
733	4.03717	0.137354		733	0.511314	1.08143		733	2.7356	0.47589
734	0.4656	0.157413		734	1.30208	3.0001		734	0.47716	0.268423
735	0.359896	0.78192		735	3.89181	0.794392		735	0.293266	1.2198
736	0.474449	0.197962		736	1.60503	0.461795		736	0.626121	0.546953
737	0.636293	0.0445128		737	0.277904	0.39696		737	0.455336	0.350926
738	0.182022	0.0820804		738	3.70747	0.445204		738	0.370211	0.458544
739	0.5849	0.890585		739	0.237155	0.446912		739	0.441552	1.09333
740	0.999976	2.38922		740	0.406389	4.12815		740	1.4578	1.91034
741	7.19778	0.277906		741	0.244669	0.843591		741	7.14461	0.815666
742	1.15072	0.717845		742	0.971436	0.660259		742	1.47205	1.12455
743	0.629396	0.473776		743	0.365354	0.903979		743	0.539328	0.867107
744	0.751177	0.311241		744	0.319746	0.0438181		744	0.686266	0.519779
745	0.250381	0.431383		745	1.88462	1.31461		745	0.434616	0.854264
746	1.45348	0.414098		746	0.107983	0.249599		746	1.1315	0.761329
747	0.427311	0.341439		747	0.491411	1.23192		747	0.660846	0.36436
748	0.502092	0.260405		748	0.813637	0.55215		748	0.425995	0.53013
749	1.27645	0.343042		749	0.477331	0.306132		749	1.66182	0.439654
750	0.242253	0.599082		750	0.66554	3.05273		750	0.377938	0.621559
751	0.589126	0.143816		751	2.4203	1.46043		751	0.616867	0.537394
752	0.385223	1.42329		752	0.746963	2.50081		752	0.738215	1.70757
753	0.768461	0.340091		753	0.299326	2.30977		753	0.54787	0.410572
754	0.622894	0.54133		754	0.459875	4.42131		754	1.10775	0.940382
755	0.726975	0.781955		755	1.73818	-0.00685921		755	0.427123	0.541648
756	0.473262	0.251236		756	0.790344	1.50361		756	0.42187	0.482244
757	0.845367	0.333501		757	0.478171	1.54566		757	0.616343	0.753011
758	0.145969	1.19018		758	1.09739	1.13398		758	0.30565	1.89355
759	0.578249	0.311765		759	0.791056	1.29834		759	0.725356	0.415779
760	0.0605312	2.29343		760	0.198732	2.05917		760	0.166235	3.928
761	0.120019	1.75296		761	0.240087	2.1466		761	0.161236	1.50397
762	1.56563	0.0845191		762	0.450082	0.64126		762	1.8678	0.234065
763	0.3076	0.357854		763	1.31133	2.17308		763	0.241626	0.767669
764	1.50944	0.306591		764	0.20289	1.76436		764	1.89117	0.455601
765	2.01168	0.256393		765	0.135301	1.23209		765	1.78018	0.308019
766	0.856774	0.980277		766	0.646016	2.87129		766	0.669027	1.15758
767	0.412966	0.756745		767	0.128216	0.428007		767	0.27494	0.667925
768	0.331344	0.231825		768	0.836918	0.354509		768	0.330857	0.269497
769	0.36105	1.0089		769	1.13952	1.07521		769	0.243368	0.961228
770	0.162402	0.141125		770	1.0068	0.466317		770	0.210966	0.342289
771	0.613279	0.418277		771	2.1027	0.34566		771	0.521725	0.527929
772	0.239703	0.4316		772	1.18823	2.47728		772	0.355198	0.473545
773	0.460865	0.250381		773	0.453793	0.677376		773	0.444421	0.739756
774	0.264955	0.0856181		774	0.905052	3.3526		774	0.342517	0.706998
775	0.274815	1.20599		775	1.47228	0.781315		775	0.256283	0.94258
776	0.53887	0.358119		776	0.850848	0.92016		776	0.364287	0.390119
777	0.324265	0.253907		777	1.60221	0.493465		777	0.358959	0.446833
778	0.347849	0.447399		778	0.827722	0.513666		778	0.328952	0.562787
779	0.150829	0.910707		779	1.18556	0.709045		779	0.281119	1.38979
780	0.379574	0.47381		780	3.63597	1.08425		780	0.410423	0.5906
781	0.575501	0.523118		781	0.333084	1.55906		781	0.401456	1.0129
782	0.79751	0.589399		782	0.239126	4.1792		782	0.792905	0.461178
783	0.976734	0.529501		783	0.144328	0.212165		783	1.13362	0.381227
784	1.67735	0.404567		784	0.304168	2.00992		784	1.56419	0.788547
785	0.433682	1.96511		785	0.278416	2.38301		785	0.453308	1.60842
786	1.27189	0.453139		786	1.12648	1.81445		786	1.0571	0.511382
787	0.45501	0.974706		787	1.53488	0.635409		787	0.301299	0.54086
788	0.851113	1.69203		788	0.0972458	0.866981		788	1.07995	1.23111
789	0.598316	0.854263		789	0.683229	1.84074		789	0.724272	0.587948
790	0.180698	0.878492		790	5.48501	1.08979		790	0.203468	0.839015
791	0.240822	0.259841		791	0.688658	0.48179		791	0.400793	0.484537
792	0.46349	2.60514		792	0.535785	0.84183		792	0.347952	3.1648
793	0.75391	1.26989		793	0.605422	0.338759		793	0.978693	1.50194
794	0.259237	0.346453		794	0.791035	0.762666		794	0.266763	0.890404
795	1.59818	0.508775		795	0.984357	0.469391		795	1.92242	0.373812
796	0.443251	0.681344		796	0.532315	0.839174		796	1.10692	0.79642
797	1.59803	1.3591		797	1.35462	0.135854		797	1.09931	1.89892
798	0.90684	0.552865		798	0.775634	0.391347		798	1.11291	0.407391
799	1.0292	0.694188		799	0.12221	0.993895		799	0.653533	0.63036
800	0.20142	0.818727		800	0.224958	0.0700753		800	0.206389	1.31627
801	1.82917	0.297831		801	0.881875	4.46189		801	1.53874	0.36614
802	0.569231	0.193406		802	1.89887	1.79833		802	0.716215	0.5126
803	1.03452	0.511622		803	0.904948	0.687684		803	0.807596	0.883753
804	2.78753	0.457934		804	1.8364	0.548303		804	2.36586	0.600676
805	0.425161	0.50342		805	0.302418	0.272361		805	0.429466	0.420799
806	1.37468	0.283355		806	1.09987	0.289441		806	1.22965	0.431249
807	0.448688	0.270598		807	0.773663	0.406018		807	0.437197	0.299107
808	2.23621	0.825156		808	0.711474	0.414379		808	2.45236	1.26568
809	0.418391	0.139859		809	1.57973	1.39306		809	0.352102	0.488148
810	0.325119	1.36139		810	2.8188	1.1332		810	0.336506	1.41796
811	0.262928	0.556727		811	2.24469	0.302254		811	0.407149	1.81539
812	0.727025	0.900625		812	1.3102	1.36396		812	0.629924	1.0287
813	1.05229	0.425363		813	0.964261	1.03578		813	0.656259	0.305175
814	0.236341	0.459851		814	0.802036	0.728159		814	0.450254	0.420103
815	0.721244	0.280693		815	1.25376	0.172609		815	0.720884	0.442986
816	0.513559	0.663484		816	1.70885	0.866856		816	0.725045	0.703091
817	0.719183	0.498564		817	0.465319	0.551652		817	0.826091	0.934435
818	0.349571	0.724821		818	0.931279	0.316718		818	0.385263	0.962136
819	0.9875	0.0982585		819	0.635469	0.537632		819	0.819342	0.355738
820	1.05408	0.869437		820	0.102064	0.450223		820	1.41632	0.819765
821	1.57059	0.443907		821	0.901825	0.481509		821	1.41055	0.576669
822	0.499483	2.60889		822	0.467199	0.385489		822	1.16051	1.8091
823	0.439738	0.445159		823	0.748892	0.787098		823	0.300539	0.440557
824	0.57518	0.699704		824	0.222985	0.175025		824	0.622186	0.999863
825	0.363752	1.4244		825	0.72616	0.443018		825	0.92627	1.55718
826	3.38499	1.52757		826	0.344204	0.519817		826	3.00629	0.751649
827	0.790773	0.410602		827	1.50876	0.109796		827	0.70107	1.10856
828	1.1366	2.01624		828	0.113476	1.55716		828	1.76261	2.86165
829	0.73552	0.940352		829	0.729517	0.130879		829	0.612444	0.906584
830	0.372756	0.826188		830	0.154533	1.00163		830	0.235872	0.771084
831	0.481356	1.02276		831	0.211667	0.547049		831	0.79539	1.10905
832	1.55202	1.93411		832	0.618715	0.576182		832	1.62882	1.56617
833	1.72579	4.35094		833	0.81939	1.90121		833	1.95485	4.46979
834	1.49418	0.355287		834	0.364458	0.370593		834	1.12806	0.444306
835	0.746574	1.01517		835	3.2388	0.32608		835	0.363749	1.01433
836	1.26215	0.295591		836	2.0587	0.628308		836	1.21093	0.462551
837	1.7606	0.593015		837	1.85642	0.805055		837	1.68882	0.854034
838	0.520545	0.389489		838	0.0430688	0.739585		838	0.449347	0.788826
839	1.26625	0.65075		839	4.22133	0.78009		839	1.12552	2.38528
840	0.900245	0.507323		840	1.36344	0.398367		840	0.657053	0.335888
841	0.533321	3.02762		841	1.24255	0.502932		841	0.474628	3.07668
842	0.27786	0.377144		842	0.35955	0.248948		842	0.672503	0.684807
843	0.706892	0.713465		843	0.268108	0.198578		843	0.953628	0.958897
844	0.319506	0.905575		844	0.51077	1.07988		844	0.376542	1.64697
845	1.50384	0.971089		845	0.341042	0.12641		845	1.35077	1.97547
846	0.0504181	0.291614		846	2.33656	0.839173		846	0.285947	0.463567
847	0.138436	2.06414		847	1.57422	0.907431		847	0.224979	1.64838
848	1.01493	0.666431		848	0.655893	0.482556		848	1.60143	0.472633
849	0.447902	1.45447		849	1.66393	0.258747		849	0.479591	1.15088
850	0.540222	0.429268		850	3.04015	0.21201		850	0.618371	0.409065
851	0.960396	2.54405		851	0.578527	0.794695		851	0.978766	2.28199
852	0.732287	0.542088		852	0.752872	0.191412		852	1.10143	0.392346
853	0.664237	0.645189		853	0.987629	0.234593		853	1.02184	0.81939
854	0.530488	1.20812		854	0.502076	0.46683		854	0.607147	1.25866
855	1.22885	4.33525		855	0.52099	0.212147		855	1.29081	2.98445
856	0.983299	0.774596		856	1.05782	0.712775		856	1.27349	0.890391
857	0.386522	0.0546397		857	0.602146	0.32753		857	0.4207	0.356769
858	2.39477	1.23601		858	0.332447	0.242615		858	2.39592	1.24522
859	0.412463	1.92159		859	1.44987	1.84842		859	0.665922	2.19463
860	0.1478	1.88466		860	1.30461	0.775451		860	0.255138	2.03893
861	0.916171	0.591354		861	0.419838	0.461596		861	0.863209	0.521447
862	0.348303	0.497492		862	0.487284	0.0826637		862	0.770678	0.416907
863	2.10209	1.04774		863	0.154358	1.48408		863	1.92885	0.684294
864	1.16738	0.304933		864	0.55661	1.1496		864	0.938405	0.73411
865	0.846331	0.3947		865	1.7079	0.5962		865	1.01679	0.70317
866	0.351473	1.24063		866	0.867431	0.37385		866	0.333037	1.09401
867	0.310538	0.660405		867	0.549948	0.4122		867	0.22255	0.483526
868	0.414066	0.203957		868	0.46748	0.570546		868	0.4075	0.718342
869	0.355087	0.726583		869	0.159882	0.732444		869	0.988171	0.819063
870	0.915331	0.147854		870	0.614339	0.384262		870	0.739489	0.351502
871	0.464825	0.294195		871	2.33634	1.96323		871	0.876036	0.556646
872	0.287286	0.349572		872	1.14321	0.269195		872	0.618069	0.389632
873	0.192646	0.526901		873	0.62439	0.595934		873	0.46679	0.500805
874	0.575271	0.141561		874	0.733887	0.189427		874	0.727374	0.521178
875	1.24714	0.797322		875	0.512343	0.418425		875	1.03488	0.859026
876	1.36569	0.224733		876	1.28126	0.992044		876	1.35227	0.377224
877	4.86454	0.0155144		877	0.12868	0.349837		877	6.05099	0.387876
878	0.375138	0.142312		878	0.699875	0.358282		878	0.539453	0.463086
879	0.747851	1.24729		879	0.676192	0.483071		879	0.824349	1.06429
880	0.458251	0.625749		880	0.840464	1.37978		880	0.553308	0.847965
881	1.16482	1.25479		881	0.477766	1.33815		881	1.08072	2.21857
882	0.94531	2.02858		882	0.893909	0.383178		882	0.570482	1.62923
883	0.11366	0.540256		883	0.851088	0.825199		883	0.479183	0.534058
884	0.426853	0.639902		884	0.343595	0.0120617		884	0.587297	0.617442
885	1.0684	0.284944		885	0.846788	0.156152		885	1.51064	0.396988
886	0.0401119	0.726474		886	3.38115	1.92601		886	0.325747	1.42678
887	0.156037	0.207102		887	0.50309	0.0659413		887	0.217166	0.471797
888	0.31625	0.456703		888	0.337553	0.522993		888	0.334022	0.464303
889	0.247571	2.6033		889	0.441785	0.50938		889	0.306214	1.94612
890	0.769169	1.27442		890	1.03291	2.69057		890	0.565831	1.13134
891	0.75055	0.354488		891	0.880174	0.690621		891	0.949511	0.786789
892	0.950296	0.127428		892	0.45195	0.319436		892	0.802858	0.363224
893	0.443741	0.302467		893	2.18199	1.00378		893	0.399926	0.398149
894	0.513083	0.216293		894	0.694851	0.245279		894	0.621792	0.346323
895	0.248046	0.774882		895	0.768861	0.124643		895	0.364118	0.605118
896	0.487903	0.465844		896	2.29861	0.745604		896	0.764462	0.599425
897	0.107289	0.640814		897	3.49243	0.688346		897	0.641075	0.801235
898	2.51638	1.41485		898	0.266557	0.769639		898	2.08334	1.70017
899	0.255941	0.577029		899	2.0035	0.877581		899	0.421169	0.671559
900	1.60877	1.24991		900	0.398394	1.03885		900	1.5236	1.46133
901	0.305672	1.03099		901	0.112216	0.349327		901	0.460134	0.908879
902	2.31811	0.298315		902	1.99819	1.15825		902	1.72019	0.398941
903	1.95911	0.308253		903	0.179581	2.27906		903	1.63753	0.323452
904	0.864018	0.226631		904	0.322935	0.708981		904	0.712252	0.4609
905	0.612776	1.26128		905	0.470913	2.2225		905	0.661045	1.26577
906	0.743001	0.580442		906	0.481051	0.977042		906	0.916616	0.549747
907	0.808636	1.99813		907	0.24054	0.652932		907	0.968376	1.65398
908	0.300345	3.02323		908	1.08197	2.1499		908	0.570089	3.68693
909	2.37199	0.256938		909	0.383998	0.210478		909	2.94367	0.301841
910	0.480224	0.793388		910	0.94736	0.394305		910	0.260832	0.765307
911	0.294587	0.375878		911	0.678954	0.547362		911	0.502578	0.696832
912	0.398282	0.245545		912	1.51681	3.18418		912	0.324807	0.435625
913	5.3465	0.472066		913	0.426938	0.267683		913	3.94699	0.368011
914	0.85633	0.445717		914	0.405648	0.2488		914	0.934169	0.519764
915	0.292548	1.03847		915	2.10626	1.02444		915	0.479667	1.16186
916	0.816408	0.517243		916	0.805695	0.0468129		916	1.15659	0.685318
917	0.690249	0.213545		917	1.68777	0.927358		917	1.14049	0.723741
918	2.20065	0.879339		918	0.387818	0.0456482		918	2.38444	1.0894
919	2.03579	0.607022		919	0.346043	0.481464		919	2.74107	0.410602
920	1.8562	1.98924		920	0.605524	0.00894233		920	1.53565	1.52459
921	0.419229	0.577767		921	0.478047	0.22583		921	0.349408	0.679491
922	0.511963	1.36697		922	0.443402	2.30263		922	0.367156	1.61538
923	2.30568	0.567009		923	0.824836	0.593365		923	1.31719	0.279923
924	0.441694	1.14861		924	1.80822	0.500064		924	0.653017	1.05045
925	0.874967	0.455898		925	2.27797	0.268019		925	0.591663	0.386108
926	0.916966	0.823002		926	1.64027	0.124423		926	0.848605	0.667387
927	0.315654	0.198716		927	1.39137	1.44604		927	0.428353	0.345094
928	0.852867	0.123411		928	1.09475	0.319311		928	0.961167	0.396394
929	1.397	0.760514		929	0.719036	0.974124		929	0.872193	0.888523
930	0.374468	0.218469		930	0.430146	0.842185		930	0.416248	0.463641
931	3.13941	0.723397		931	0.665943	0.101969		931	3.17508	0.492151
932	1.91309	0.31943		932	0.138109	0.20664		932	2.21277	0.633123
933	0.253356	0.462433		933	1.02654	0.571		933	0.513927	0.436006
934	1.36915	0.355965		934	0.887802	0.493251		934	0.815965	0.421298
935	1.94905	1.66809		935	1.19611	0.358635		935	1.71239	1.2554
936	0.396644	0.330868		936	1.02742	0.422406		936	0.434274	0.330941
937	2.82864	1.58077		937	0.50817	1.78766		937	3.36707	0.951743
938	1.87869	0.866671		938	0.856144	0.57831		938	1.57933	0.701371
939	2.83486	0.443503		939	1.09162	0.459484		939	1.59179	0.304276
940	0.509101	0.434548		940	0.614045	1.72433		940	0.514527	0.318903
941	3.96803	0.801873		941	0.328491	0.502848		941	2.35843	0.880038
942	1.41432	0.360326		942	2.41774	2.18853		942	0.974888	0.396305
943	1.24317	1.64003		943	0.299592	0.970566		943	1.19698	1.30914
944	0.423826	0.731504		944	0.344681	0.0673572		944	0.538978	0.622524
945	1.42671	0.3133		945	1.96819	2.03296		945	1.46038	0.306315
946	1.51451	0.119488		946	1.13148	0.159493		946	0.764492	0.272235
947	0.83213	0.32281		947	0.21015	0.450205		947	0.593103	0.479565
948	0.617897	0.747429		948	0.540776	0.518181		948	0.709025	0.430629
949	0.29282	0.215468		949	1.02914	2.90008		949	0.633521	0.423615
950	0.322197	1.24907		950	0.350875	0.338086		950	0.487563	1.51002
951	0.93078	0.570461		951	0.402291	2.20349		951	1.14532	1.94881
952	0.515463	0.674998		952	0.852812	0.689968		952	0.425947	0.608103
953	0.1733	1.09372		953	3.6218	0.804954		953	0.271016	1.41753
954	0.408687	2.03705		954	0.23638	0.664481		954	0.799218	1.54875
955	0.478998	0.819114		955	1.94806	0.519136		955	0.575193	1.15263
956	0.660692	1.01373		956	0.68871	1.78158		956	0.608525	1.72353
957	0.864329	0.81619		957	0.334235	1.02536		957	0.64002	0.614171
958	0.288913	0.131887		958	1.6481	1.59008		958	0.374445	0.272759
959	1.54128	0.214601		959	0.348092	0.144594		959	1.52163	0.802351
960	2.26335	1.35353		960	0.498007	0.0507996		960	1.84473	1.00178
961	0.0948388	1.60059		961	0.140735	0.456502		961	0.293631	1.91713
962	0.245642	0.513603		962	1.62301	1.0493		962	0.377956	0.433528
963	0.443972	2.51832		963	0.534925	1.63275		963	0.514469	2.56947
964	1.58053	0.962543		964	0.489143	0.618669		964	1.51403	0.924328
965	0.349425	1.58184		965	2.03313	1.01321		965	0.408441	1.28828
966	6.22899	0.745006		966	0.715794	0.368197		966	4.54668	1.08519
967	0.606716	0.394603		967	0.827057	0.288029		967	0.539947	0.6863
968	1.09432	0.460099		968	2.77548	1.41209		968	1.3239	0.487
969	1.3514	1.73451		969	2.17939	0.407139		969	1.28988	2.07968
970	3.29328	1.15689		970	0.465525	0.44463		970	2.57237	1.22749
971	0.136099	1.16478		971	0.315449	0.2858		971	0.536959	1.01114
972	2.43117	0.495184		972	1.2017	1.37346		972	1.95641	0.779846
973	0.673292	0.830604		973	3.00158	0.53207		973	0.475153	1.12715
974	0.631637	0.0657533		974	0.497152	1.11213		974	0.783407	0.276853
975	2.23834	0.307801		975	0.345016	0.150266		975	1.2772	0.278521
976	2.9406	0.963602		976	0.305394	0.700726		976	2.63614	1.82247
977	0.463103	0.665495		977	1.28116	0.226341		977	0.531243	0.76492
978	1.47051	0.0341645		978	1.09332	0.354643		978	1.15113	0.3631
979	0.826533	1.22672		979	1.42834	4.48257		979	1.06607	0.633839
980	0.31792	0.808562		980	1.49432	0.149978		980	0.490039	1.12706
981	0.641827	1.17228		981	0.46703	0.415342		981	0.630645	0.777359
982	0.375528	0.9589		982	0.913823	0.443293		982	0.411625	1.35938
983	0.765245	2.04998		983	0.513103	0.0626919		983	0.900496	1.48915
984	3.99161	0.22915		984	2.28193	0.509217		984	4.11668	0.555104
985	0.435863	0.336928		985	0.660801	3.95049		985	0.427713	0.46435
986	0.598488	0.559585		986	0.790319	0.661607		986	0.419685	0.802247
987	0.550154	0.800893		987	3.20428	0.142026		987	0.788176	1.05777
988	0.198607	0.644996		988	0.0214969	2.28532		988	0.419972	1.1876
989	2.01273	2.50699		989	0.155425	3.02942		989	3.02153	1.8933
990	0.96531	0.951722		990	0.355503	0.1557		990	1.22002	1.28779
991	2.08829	1.73872		991	0.240702	0.710108		991	2.2123	1.55663
992	0.45573	1.60227		992	1.63875	1.547		992	0.491141	1.35712
993	0.586451	0.263199		993	1.92913	0.896473		993	0.508668	0.409897
994	1.1162	0.259568		994	0.890183	1.86776		994	1.04132	0.466
995	0.76892	1.02715		995	0.686134	1.2791		995	0.488915	0.753662
996	0.759918	0.961481		996	2.94058	0.19019		996	0.741961	1.59814
997	0.710198	1.06345		997	2.39991	1.40913		997	0.361277	1.48796
998	1.69371	1.03097		998	0.309902	1.08687		998	1.38279	1.35398
999	0.273864	1.36433		999	2.62527	0.562062		999	0.28234	1.47757
1000	0.560258	1.44209		1000	0.704219	1.23997		1000	0.869748	1.52739
1001	0.416319	1.17741		1001	1.07078	0.292621		1001	0.79894	0.791991
1002	0.645422	0.307404		1002	1.04174	0.414198		1002	0.578332	0.505849
1003	1.77835	0.444875		1003	0.321197	1.00447		1003	1.51465	0.525084
1004	0.282874	0.200883		1004	0.603037	0.541157		1004	0.399999	0.56793
1005	0.234412	0.854546		1005	0.311568	0.509555		1005	0.285451	1.08983
1006	0.756479	0.188759		1006	0.63292	0.927095		1006	0.732935	0.49879
1007	0.447232	1.03754		1007	0.549933	0.547711		1007	0.689139	0.929082
1008	0.265243	2.48334		1008	0.103813	0.392196		1008	0.499254	2.98199
1009	0.664738	2.82521		1009	1.1443	0.874743		1009	0.408158	2.5523
1010	0.532696	0.612125		1010	2.19104	2.24013		1010	0.583032	0.599513
1011	0.672923	0.757853		1011	0.188791	1.51579		1011	0.583915	0.486893
1012	0.395335	0.914807		1012	1.31563	0.296481		1012	0.52902	1.22698
1013	0.771185	2.05198		1013	0.180512	0.282116		1013	0.826715	1.70025
1014	0.841688	0.904576		1014	0.691971	1.22367		1014	0.668365	1.00117
1015	3.26259	0.0954848		1015	0.139071	1.04645		1015	1.90691	0.426138
1016	0.501156	0.258863		1016	0.964096	0.240232		1016	0.51996	0.440477
1017	0.700752	1.09951		1017	0.417658	0.226379		1017	0.740099	1.19081
1018	0.884372	0.742729		1018	1.89883	0.631228		1018	1.00494	0.705817
1019	0.711333	0.978425		1019	0.511381	0.898826		1019	0.59378	0.928267
1020	2.66455	0.623034		1020	0.934884	0.256598		1020	1.5764	0.714613
1021	0.315729	0.142817		1021	3.63136	3.21154		1021	0.41941	0.386971
1022	0.36133	0.177346		1022	1.79885	0.123068		1022	0.356679	0.425998
1023	0.615412	0.640148		1023	0.372028	0.0795502		1023	0.485258	1.42293
1024	1.94747	0.468319		1024	0.527477	0.476179		1024	1.6066	0.491526
1025	0.753729	1.30591		1025	0.682918	1.15133		1025	0.626712	1.90584
1026	0.383492	2.78564		1026	0.777648	0.236743		1026	0.359584	2.96953
1027	0.940026	0.336656		1027	0.792789	0.125547		1027	0.775044	0.615725
1028	0.310869	0.732344		1028	1.16601	1.29588		1028	0.332325	1.95931
1029	1.08609	0.153378		1029	1.07969	1.00819		1029	0.906826	0.674326
1030	0.577256	0.247099		1030	0.855472	0.742915		1030	0.475875	0.746006
1031	1.10742	0.308395		1031	0.361383	0.92947		1031	0.740599	0.47713
1032	0.550107	0.357781		1032	1.54761	0.659066		1032	0.297309	0.572868
1033	0.468336	0.402278		1033	0.448812	0.611267		1033	0.553576	0.482
1034	0.284973	0.494116		1034	0.517608	0.338285		1034	0.387811	0.470121
1035	1.43132	1.59087		1035	0.576319	1.49538		1035	2.12018	1.1771
1036	0.421418	0.318216		1036	1.31034	3.14014		1036	0.231309	0.67465
1037	0.522997	0.91313		1037	0.533807	0.465862		1037	0.455504	0.400586
1038	1.59281	0.401903		1038	0.406245	0.562804		1038	0.715942	0.57849
1039	1.93308	0.224494		1039	0.635069	1.99826		1039	2.03094	0.5122
1040	1.1675	0.845922		1040	0.383203	0.325204		1040	0.837316	1.07297
1041	0.858397	1.06353		1041	0.48951	0.890733		1041	0.885971	0.862772
1042	1.50496	0.960702		1042	0.178977	0.18777		1042	1.50576	1.38858
1043	0.278859	1.71951		1043	0.172474	0.568105		1043	0.333085	1.4114
1044	1.74382	0.0478058		1044	2.45916	1.95809		1044	1.91681	0.3485
1045	0.427104	2.27865		1045	1.44408	0.406179		1045	0.430547	3.26292
1046	0.48566	1.16611		1046	0.5751	0.367919		1046	0.490009	1.35847
1047	0.959826	0.722316		1047	0.333469	2.24564		1047	1.52612	1.06205
1048	0.837788	0.527785		1048	0.547064	1.54337		1048	0.688888	0.352163
1049	0.881579	0.0812246		1049	1.4701	0.845637		1049	0.637318	0.435365
1050	0.493028	0.389863		1050	0.864492	0.476375		1050	0.438809	0.55167
1051	1.29943	0.327722		1051	1.47468	0.0357917		1051	1.44	0.552553
1052	1.68097	0.690095		1052	1.77663	2.6235		1052	1.72365	1.93322
1053	1.06239	1.01859		1053	0.371802	0.664321		1053	0.857918	1.13976
1054	0.487077	0.636788		1054	0.472748	1.00785		1054	0.421883	0.930361
1055	0.742765	0.383968		1055	0.610074	0.983996		1055	0.538297	0.697322
1056	0.694183	0.0806175		1056	2.18655	0.767894		1056	0.560414	0.34392
1057	1.01823	0.578432		1057	1.92224	0.920624		1057	0.754843	1.02659
1058	0.734561	0.544414		1058	0.698951	0.289948		1058	0.575692	1.18079
1059	0.647244	0.339024		1059	0.287374	0.00198663		1059	0.538885	0.430125
1060	1.67296	0.917469		1060	0.484332	0.230726		1060	1.41918	0.997662
1061	1.73931	1.23579		1061	1.87766	0.530447		1061	1.17465	2.05765
1062	0.475041	3.94406		1062	0.957832	0.415716		1062	0.636958	5.78459
1063	0.532013	0.0671511		1063	1.7536	1.78153		1063	0.953658	0.310218
1064	0.404814	1.93711		1064	2.92147	0.651533		1064	0.458982	2.02126
1065	2.27708	0.510642		1065	0.384081	0.315311		1065	1.90045	0.739072
1066	1.72177	1.55652		1066	0.543149	0.389059		1066	1.1821	1.98358
1067	2.03157	0.763384		1067	2.62857	1.74668		1067	0.908285	1.68944
1068	0.28656	0.107974		1068	2.48311	0.426209		1068	0.501552	0.372395
1069	3.41841	2.20649		1069	0.311745	2.9106		1069	3.66267	2.79985
1070	1.56692	0.115017		1070	0.620995	1.96777		1070	1.16633	0.46561
1071	0.947701	0.258405		1071	1.09992	1.29569		1071	0.709722	0.895715
1072	0.358711	0.303949		1072	0.902595	0.79327		1072	0.84438	0.415127
1073	1.19953	0.55399		1073	1.02055	0.13273		1073	1.16447	1.51004
1074	0.0981708	0.207589		1074	0.0896747	0.77983		1074	0.295237	0.340449
1075	0.787599	0.236254		1075	0.729764	0.81497		1075	0.430267	0.624179
1076	0.929812	0.531439		1076	2.11083	0.246502		1076	0.912722	0.766524
1077	1.60981	0.323534		1077	0.651867	0.639135		1077	1.71427	0.481698
1078	0.369177	0.754296		1078	1.30903	0.766471		1078	0.408208	1.38739
1079	1.35445	0.284787		1079	0.803092	2.99792		1079	0.934491	0.56034
1080	3.58718	0.674186		1080	1.00231	1.02991		1080	3.18621	0.690668
1081	0.84674	0.60861		1081	0.477669	0.763114		1081	0.665632	0.941321
1082	1.79298	0.570425		1082	0.242167	1.33068		1082	0.933227	0.802893
1083	2.27511	0.189722		1083	0.413967	0.747005		1083	2.19061	0.337484
1084	0.292786	0.289725		1084	0.159566	0.811254		1084	0.416011	0.742505
1085	0.617132	0.163579		1085	0.406412	0.63248		1085	0.652385	0.374265
1086	0.515012	1.20228		1086	0.332805	0.278971		1086	0.357269	2.10195
1087	1.41196	1.05141		1087	2.07356	0.963274		1087	1.07645	1.00026
1088	0.728384	0.0553239		1088	0.380256	0.822081		1088	0.878586	0.331429
1089	3.30931	0.292985		1089	0.468605	2.66166		1089	3.79197	0.418487
1090	0.934613	1.11124		1090	0.020855	0.595896		1090	1.36849	1.55995
1091	1.37916	0.184968		1091	1.40622	0.682218		1091	1.15751	0.457917
1092	1.91503	0.486734		1092	0.727255	0.247103		1092	1.60917	0.510517
1093	0.50826	0.512856		1093	1.69568	0.752144		1093	0.439598	0.75611
1094	2.94784	2.17258		1094	0.435077	0.133631		1094	3.03575	1.98538
1095	1.78014	0.537417		1095	0.735933	2.06447		1095	2.03302	0.75285
1096	2.28553	1.01375		1096	3.20446	0.372922		1096	1.46374	1.19625
1097	0.920615	2.31046		1097	0.902583	0.968033		1097	0.869288	2.1742
1098	0.596546	0.241608		1098	0.849461	0.529395		1098	0.681711	0.397622
1099	1.11074	0.601481		1099	0.4311	0.413237		1099	1.20839	0.386033
1100	1.25348	0.233279		1100	0.495896	0.887092		1100	1.34921	0.586293
1101	1.25272	0.851729		1101	0.807667	0.0867193		1101	0.850656	1.21648
1102	1.05413	0.581527		1102	1.43733	0.72544		1102	1.0313	0.72837
1103	0.693289	0.382148		1103	0.393769	0.328739		1103	0.366246	0.591298
1104	4.91107	0.695747		1104	0.209701	0.683668		1104	4.14885	0.888821
1105	1.26586	0.460408		1105	1.53559	1.34547		1105	1.00996	0.602873
1106	0.34331	1.85298		1106	0.604046	0.808462		1106	0.499284	2.79051
1107	1.58508	0.778003		1107	1.13425	0.27322		1107	1.32534	1.4887
1108	0.218655	0.212988		1108	1.00473	0.201356		1108	0.552709	0.566476
1109	2.37719	0.268746		1109	0.515172	1.08622		1109	1.805	0.370435
1110	0.133435	0.379043		1110	5.38993	0.624735		1110	0.244843	0.452755
1111	0.207291	0.354768		1111	0.299972	0.46551		1111	0.453704	0.395459
1112	0.648039	0.665387		1112	0.424883	0.124004		1112	0.777875	0.711742
1113	0.527308	1.16047		1113	0.448549	1.75329		1113	0.46705	1.22346
1114	0.554919	0.177483		1114	0.224108	0.0471051		1114	0.923832	0.950253
1115	2.23322	0.376154		1115	0.938458	0.567442		1115	1.61127	0.309909
1116	1.52591	1.20849		1116	2.81117	0.0642323		1116	1.04168	0.492211
1117	0.312172	0.33841		1117	1.07698	0.507853		1117	0.523912	0.293213
1118	0.737262	0.926572		1118	0.546061	0.242233		1118	0.480208	1.28084
1119	0.950407	0.348983		1119	2.18235	0.418059		1119	0.815786	1.04665
1120	0.618831	0.279164		1120	1.33726	1.56506		1120	0.489366	0.333783
1121	0.597721	0.441536		1121	1.11269	0.965002		1121	0.739347	0.244237
1122	0.575151	0.476532		1122	0.91212	0.656308		1122	0.331636	0.549585
1123	2.40238	0.422178		1123	0.211693	0.255449		1123	1.55458	0.598864
1124	1.51005	0.0391982		1124	0.445388	0.935613		1124	1.31184	0.454056
1125	0.510953	0.00636867		1125	1.40828	1.88535		1125	0.524745	0.395861
1126	0.248784	0.0928556		1126	0.188664	0.233801		1126	0.346793	0.383739
1127	1.47396	0.713705		1127	1.38166	0.316298		1127	1.17724	0.501089
1128	1.62116	0.275193		1128	1.07687	0.624331		1128	2.22436	0.350798
1129	1.38098	0.218175		1129	0.284966	0.89823		1129	0.985989	0.548344
1130	0.339927	0.828224		1130	3.06485	0.21718		1130	0.605079	0.942234
1131	0.796402	0.749711		1131	1.14737	0.535105		1131	0.812852	0.62903
1132	1.84243	1.46706		1132	1.36264	0.0914543		1132	2.3267	1.49503
1133	1.01769	0.163447		1133	1.03275	0.569527		1133	1.30252	0.365237
1134	0.801352	0.265828		1134	1.35828	0.883581		1134	1.0336	0.348812
1135	0.515373	0.392714		1135	0.11149	1.48505		1135	0.251678	0.325325
1136	1.04495	0.459422		1136	0.968126	0.0566961		1136	1.24226	0.607987
1137	0.329753	0.316897		1137	2.24608	0.322591		1137	0.283784	0.396692
1138	0.323915	0.354318		1138	0.725276	2.14747		1138	0.43071	0.734868
1139	1.04662	1.54665		1139	1.47132	0.170603		1139	0.617142	1.40582
1140	0.94762	0.477114		1140	2.794	0.718275		1140	0.726144	0.838415
1141	4.11139	0.295671		1141	0.407547	0.447752		1141	2.82003	0.371988
1142	0.826207	1.58999		1142	1.29847	0.723312		1142	0.909286	1.7836
1143	0.383869	1.00242		1143	0.238599	2.04097		1143	0.750489	1.14461
1144	0.324104	0.322911		1144	1.60129	2.15382		1144	0.431507	0.522204
1145	0.586839	0.457249		1145	2.46003	1.77977		1145	0.547257	0.61988
1146	0.438757	1.33077		1146	0.0787759	1.10519		1146	0.509338	1.26848
1147	0.844787	0.419799		1147	1.93968	1.04294		1147	1.03488	0.415497
1148	0.552058	0.784308		1148	0.126302	0.380679		1148	0.678319	0.653257
1149	0.567055	0.324243		1149	0.194085	3.13456		1149	0.697764	0.526051
1150	0.97224	0.839185		1150	0.325809	0.201436		1150	0.938442	2.01999
1151	0.582401	0.318256		1151	0.921374	0.768901		1151	0.895372	0.607719
1152	0.591228	0.297181		1152	0.845224	0.655058		1152	1.25783	0.220436
1153	0.535452	1.32425		1153	2.66291	0.52395		1153	0.63939	1.33545
1154	0.284466	1.45297		1154	0.293133	4.67293		1154	0.900377	2.95612
1155	0.300168	0.117616		1155	0.542583	0.235983		1155	0.546987	0.453386
1156	0.32257	0.785086		1156	0.231876	1.70798		1156	0.52399	0.46316
1157	0.642474	0.817906		1157	2.39962	0.574319		1157	0.592809	0.337087
1158	0.413315	0.62837		1158	0.182277	0.542283		1158	1.02954	1.11035
1159	0.299199	0.314632		1159	1.06432	0.248401		1159	0.476504	0.444528
1160	1.35548	0.346338		1160	0.755325	0.437582		1160	2.06852	1.11663
1161	0.654488	0.289984		1161	1.58985	0.114705		1161	0.649504	0.357601
1162	1.46409	0.324218		1162	2.33685	1.74676		1162	0.701458	0.402808
1163	0.490603	2.26601		1163	0.177455	4.40069		1163	0.678552	4.56418
1164	1.38073	0.0731146		1164	2.42421	0.28718		1164	0.921288	0.320424
1165	1.64183	2.49947		1165	0.727962	1.0289		1165	1.01095	2.92386
1166	0.723823	0.720396		1166	1.09696	0.043011		1166	0.789766	1.03242
1167	0.0655064	0.205633		1167	0.960369	2.7149		1167	0.274555	0.457709
1168	0.210615	0.926597		1168	0.592926	0.262317		1168	0.261311	0.43428
1169	2.62837	0.0832153		1169	2.12025	2.27675		1169	2.23989	0.377747
1170	3.26157	1.41691		1170	0.804778	0.246162		1170	2.93067	1.64451
1171	0.530249	0.887618		1171	2.76773	0.00684623		1171	0.520053	0.550211
1172	1.67196	0.129147		1172	0.434446	0.607628		1172	1.18478	0.234782
1173	1.68937	0.133053		1173	1.21646	-0.0298512		1173	1.45453	0.303598
1174	1.44869	0.431948		1174	0.589484	0.851568		1174	1.57613	0.384496
1175	1.78204	0.950346		1175	1.09859	0.219855		1175	1.15023	1.6548
1176	0.332054	0.276982		1176	0.436163	0.0906807		1176	0.617014	0.663043
1177	1.84592	0.213298		1177	6.68787	0.53516		1177	1.81001	0.360163
1178	0.689639	0.28172		1178	1.58512	0.531563		1178	0.594042	0.615099
1179	0.918085	0.459621		1179	1.91637	0.245467		1179	0.887373	0.179359
1180	0.532313	0.451148		1180	1.20436	0.0234414		1180	0.426674	0.585567
1181	0.445786	0.447505		1181	1.23779	0.337302		1181	0.504711	0.784321
1182	0.482513	1.51396		1182	1.35094	0.3779		1182	0.586311	2.85983
1183	0.717686	1.26551		1183	0.264228	0.0515175		1183	1.02951	2.06406
1184	0.382771	0.154631		1184	0.954742	2.94147		1184	0.556528	0.416569
1185	0.276812	0.503751		1185	0.889445	2.76605		1185	0.475725	0.870312
1186	0.417817	0.0642798		1186	0.43342	0.449439		1186	0.666222	0.432788
1187	0.764753	1.00292		1187	0.327388	0.501639		1187	0.835181	0.879247
1188	1.09547	0.509205		1188	1.75728	0.400156		1188	0.92862	0.55025
1189	0.944162	0.779449		1189	0.850382	0.494823		1189	1.69632	1.32765
1190	2.50888	0.342039		1190	0.838138	0.794192		1190	1.78355	0.423592
1191	0.388303	0.558491		1191	1.20752	0.956297		1191	0.322683	1.12928
1192	0.83307	2.15304		1192	0.940732	0.884382		1192	0.523099	2.86781
1193	0.554663	0.629969		1193	1.37779	0.456201		1193	0.487793	0.450969
1194	0.347453	0.0541495		1194	0.549721	0.749117		1194	0.315946	0.267522
1195	0.44003	0.0964386		1195	0.510039	1.32429		1195	0.774487	0.24372
1196	0.855172	1.21334		1196	0.46045	0.138195		1196	0.659312	1.9274
1197	0.914424	0.264686		1197	0.57542	1.78718		1197	0.544497	0.458349
1198	0.128272	0.62056		1198	0.514678	0.422157		1198	0.36158	1.02514
1199	1.52376	0.411341		1199	0.43808	0.417405		1199	1.59982	0.412989
1200	0.689225	0.1609		1200	2.20799	0.223763		1200	0.739376	0.329083
1201	0.416594	0.370414		1201	0.722342	0.422039		1201	0.330768	0.516235
1202	0.42942	0.0874864		1202	0.675915	1.13442		1202	0.761482	0.428173
1203	0.256709	0.0840952		1203	1.23199	1.20848		1203	0.369966	0.261622
1204	0.3086	0.397296		1204	0.369103	0.111158		1204	0.303694	0.545049
1205	1.93401	0.508919		1205	1.39516	0.161014		1205	1.98286	1.20153
1206	1.89551	0.285562		1206	0.475588	1.71366		1206	1.64506	0.716121
1207	0.603272	0.233567		1207	1.8346	0.28596		1207	0.534179	0.359483
1208	0.235476	0.403953		1208	0.943873	0.601528		1208	0.401419	0.310105
1209	-0.0271599	1.99844		1209	1.22668	1.38318		1209	0.45545	2.4168
1210	1.23047	0.288952		1210	1.27581	0.261381		1210	1.54432	0.411773
1211	0.519741	0.785681		1211	0.634777	0.276346		1211	0.538992	0.91706
1212	1.4524	0.468302		1212	0.823902	0.406524		1212	1.40988	0.585569
1213	0.449264	0.737011		1213	0.7815	0.40811		1213	0.392103	0.64748
1214	0.829379	2.55458		1214	0.490904	0.427474		1214	0.845071	4.609
1215	0.249764	0.210798		1215	2.41525	0.347982		1215	0.250373	0.370079
1216	2.24283	0.0607046		1216	0.43837	0.426907		1216	2.04319	0.269667
1217	1.86646	0.0864988		1217	0.51325	0.84547		1217	1.62288	0.26041
1218	0.351552	0.230857		1218	1.15855	1.57345		1218	0.578074	0.313386
1219	2.54906	0.654566		1219	0.88888	0.230642		1219	2.12348	0.89584
1220	0.510823	1.06728		1220	1.91767	2.52739		1220	0.777895	0.559769
1221	0.667281	2.38922		1221	0.911029	0.12823		1221	0.599027	2.28643
1222	0.33298	0.0884082		1222	0.375993	0.892323		1222	0.255375	0.381319
1223	0.349434	1.16496		1223	2.34579	0.504292		1223	0.791528	0.953815
1224	1.62986	0.72493		1224	0.481212	1.80599		1224	2.30969	0.864257
1225	0.647348	0.930392		1225	0.193458	0.36243		1225	0.539315	0.643855
1226	0.864105	0.187072		1226	0.82343	1.65896		1226	0.406119	0.307028
1227	1.88806	1.00779		1227	0.764431	0.23316		1227	1.58726	1.14575
1228	0.209138	2.02717		1228	1.36462	0.302465		1228	0.24323	2.11814
1229	0.614408	0.170688		1229	0.526389	0.473891		1229	0.915223	0.43153
1230	0.490861	0.104107		1230	1.71912	0.129061		1230	0.505708	0.391059
1231	0.692453	0.241372		1231	1.69553	1.05402		1231	0.522672	0.239783
1232	0.604058	0.157169		1232	1.04203	0.598161		1232	0.532502	0.228292
1233	0.798814	1.55943		1233	0.524513	1.02559		1233	1.01447	1.48564
1234	0.740915	0.429214		1234	3.15074	1.23704		1234	0.751872	1.09173
1235	0.303211	0.117966		1235	0.502784	0.284874		1235	0.496448	0.378019
1236	1.09465	0.1636		1236	0.895754	0.637769		1236	0.610961	0.235526
1237	0.175413	0.189717		1237	0.245588	0.125686		1237	0.324855	0.476721
1238	0.594739	0.0259019		1238	1.40193	0.43283		1238	0.511852	0.207274
1239	2.8145	0.670208		1239	2.55324	1.15569		1239	2.55621	0.554858
1240	0.31902	1.08506		1240	0.0910027	0.407826		1240	0.657949	1.15094
1241	1.06743	0.117		1241	0.651765	1.13208		1241	1.94856	0.267359
1242	1.03366	1.39512		1242	0.755543	0.541723		1242	0.841434	2.03349
1243	0.766592	0.365951		1243	0.676248	0.659113		1243	0.507112	0.376465
1244	0.479774	0.97516		1244	0.167134	1.22342		1244	0.277328	0.663625
1245	0.763679	0.248215		1245	0.24493	0.805517		1245	1.25159	0.391612
1246	2.19173	1.35831		1246	1.831	1.54389		1246	1.45361	1.36319
1247	0.144399	0.252537		1247	1.06106	0.532141		1247	0.435344	0.444667
1248	0.308483	0.28123		1248	1.39343	1.04482		1248	0.21433	0.817484
1249	0.713319	0.462138		1249	1.14393	0.33385		1249	0.887788	0.655492
1250	0.522072	0.477591		1250	0.549493	0.17835		1250	0.739238	0.489707
1251	0.378752	1.43913		1251	0.346776	0.612277		1251	0.926405	1.89669
1252	1.22526	0.899682		1252	0.372188	2.02967		1252	0.880444	0.509313
1253	0.738326	0.901542		1253	0.517282	1.55148		1253	0.55494	0.697639
1254	3.32293	0.41415		1254	2.39539	1.92457		1254	2.98151	0.606536
1255	0.602175	0.647214		1255	1.83927	1.51108		1255	0.42905	0.506033
1256	3.3393	0.630317		1256	0.748594	0.59444		1256	2.14413	0.823448
1257	1.49251	0.5952		1257	0.781127	0.640174		1257	1.22476	0.553391
1258	0.738267	0.493159		1258	1.53459	0.540355		1258	0.62262	0.91316
1259	0.741462	0.464832		1259	1.93394	0.282663		1259	0.770502	0.439854
1260	1.67007	1.29972		1260	0.129835	0.114456		1260	1.43661	1.61909
1261	0.651733	0.123472		1261	1.88432	0.886666		1261	0.642076	0.5316
1262	0.321357	1.94076		1262	0.31954	0.591051		1262	0.655457	2.54323
1263	0.203131	0.655668		1263	0.525157	0.681461		1263	0.217036	0.568889
1264	0.328491	0.557179		1264	2.8283	0.19332		1264	0.444149	0.352194
1265	0.247378	0.23839		1265	1.23195	0.387179		1265	0.242413	0.364902
1266	1.8347	0.518398		1266	0.382568	0.117673		1266	1.62319	1.27693
1267	1.45107	1.75286		1267	1.21072	2.46443		1267	1.45026	1.27982
1268	1.68434	0.782343		1268	1.35261	0.790416		1268	1.34892	0.392155
1269	0.988551	0.549487		1269	0.341271	1.15901		1269	0.633738	0.964899
1270	0.16983	2.10291		1270	0.704906	0.505119		1270	0.331702	1.94929
1271	2.94448	0.673423		1271	0.64052	1.11239		1271	2.23509	0.697105
1272	0.409193	0.13196		1272	0.463285	0.334782		1272	0.440591	0.780317
1273	2.72671	2.60469		1273	0.873198	0.217255		1273	1.6473	2.39401
1274	0.0745939	0.268937		1274	0.529902	0.683154		1274	0.292594	0.27548
1275	0.825685	0.444456		1275	1.14235	2.58062		1275	0.902457	0.881098
1276	0.817513	0.550455		1276	0.356349	0.6044		1276	1.18632	1.62915
1277	0.179991	2.83091		1277	0.784012	0.435991		1277	0.51228	3.31452
1278	1.5232	0.766717		1278	1.32123	0.464497		1278	1.84165	1.03384
1279	1.65086	-0.00495187		1279	2.40546	0.668978		1279	1.0733	0.263514
1280	0.756824	0.369861		1280	0.52415	0.852246		1280	0.847277	0.642249
1281	0.795346	1.12443		1281	1.56869	0.841393		1281	1.20815	1.1238
1282	1.23524	0.350848		1282	0.748431	0.950482		1282	1.75439	0.855477
1283	0.892582	0.222165		1283	0.307398	0.790837		1283	1.08934	0.494359
1284	0.707162	0.611954		1284	1.33812	0.744676		1284	0.726624	1.57824
1285	0.912125	0.393297		1285	0.445279	0.824652		1285	0.541473	1.21974
1286	0.226639	0.677653		1286	0.273286	0.0389281		1286	0.292572	1.03075
1287	0.156038	0.504723		1287	0.156147	0.524591		1287	0.229714	0.490382
1288	0.658095	0.376576		1288	0.687124	1.9882		1288	0.526671	0.708356
1289	0.521009	0.238348		1289	0.568562	0.52351		1289	0.428533	0.53521
1290	0.755575	0.438473		1290	1.82035	0.861676		1290	0.315142	0.358538
1291	0.428531	0.603138		1291	0.668146	2.23015		1291	0.609773	0.662781
1292	0.444874	0.231163		1292	0.316175	0.607945		1292	0.790033	0.296457
1293	0.509314	0.81618		1293	0.357812	1.51486		1293	0.377503	1.2015
1294	1.9446	0.378187		1294	1.6089	0.593128		1294	1.78064	0.388497
1295	0.639223	0.203341		1295	2.18712	0.520639		1295	0.724708	0.519523
1296	0.484663	0.152911		1296	0.836624	1.73932		1296	0.429912	0.395286
1297	0.509853	0.639599		1297	0.634697	0.553753		1297	0.512635	0.554118
1298	1.07649	0.107357		1298	2.28896	0.737785		1298	1.27891	0.334233
1299	0.644803	0.236342		1299	1.72359	1.10037		1299	0.767087	0.275315
1300	0.110922	0.189458		1300	2.00784	0.830166		1300	0.340947	0.268629
1301	0.465586	1.05442		1301	0.625693	0.665263		1301	0.631555	2.08209
1302	0.479877	0.295786		1302	0.950965	0.594554		1302	0.290653	0.757133
1303	0.0745712	0.10983		1303	2.80111	0.741686		1303	0.274415	0.606564
1304	1.20129	0.239096		1304	1.38135	0.6276		1304	1.10752	0.199548
1305	2.03483	0.0708698		1305	1.00997	1.70046		1305	2.69504	0.423512
1306	1.31518	0.354641		1306	0.387268	0.401327		1306	2.19614	0.852991
1307	1.46906	0.655577		1307	0.267959	0.374129		1307	1.37169	0.363884
1308	0.129018	1.54249		1308	3.35723	0.809989		1308	0.459577	2.06633
1309	0.734244	2.1287		1309	1.3546	1.07706		1309	1.18329	1.40163
1310	2.36334	0.340507		1310	0.248837	1.76977		1310	1.93354	0.713593
1311	0.636724	0.953097		1311	0.632772	1.58689		1311	0.864814	1.02004
1312	1.87246	1.32342		1312	2.27189	0.232603		1312	1.32977	1.5071
1313	0.615154	0.568191		1313	0.784576	0.14999		1313	0.603831	0.872082
1314	0.347076	0.399979		1314	0.620872	1.00773		1314	0.629473	0.89869
1315	0.402781	0.152734		1315	0.0626911	0.223331		1315	0.527691	0.312983
1316	1.16068	0.679498		1316	0.574726	1.57088		1316	1.09945	1.80183
1317	2.50169	0.493509		1317	0.918109	0.106302		1317	1.63368	0.419515
1318	0.710564	0.725138		1318	0.0262443	0.306652		1318	0.630078	0.592197
1319	0.709749	0.376397		1319	0.371487	0.814767		1319	1.26968	0.468862
1320	1.13471	2.03696		1320	1.07126	0.0226537		1320	2.40538	1.90294
1321	0.837251	1.79101		1321	1.0546	0.0417188		1321	0.379559	2.33504
1322	1.89925	0.246539		1322	1.05118	0.773131		1322	1.23238	0.780427
1323	0.463899	0.402722		1323	0.40619	0.10369		1323	0.329217	0.401994
1324	1.80053	1.74581		1324	0.350298	2.88005		1324	0.690416	1.10415
1325	1.07417	1.8287		1325	0.848521	0.772461		1325	1.2292	2.96307
1326	0.126266	2.21454		1326	1.29312	0.231903		1326	0.354947	2.06162
1327	2.09206	0.974157		1327	0.889034	0.720358		1327	3.27421	1.14754
1328	0.663894	1.75521		1328	0.453952	0.779866		1328	0.464914	1.44475
1329	0.83588	0.864156		1329	1.19232	1.32469		1329	0.987036	1.18591
1330	2.22544	0.526183		1330	1.26301	1.24245		1330	2.13268	0.532876
1331	0.948464	1.02794		1331	0.378024	0.350394		1331	1.24321	1.73576
1332	2.30645	0.939701		1332	0.284571	0.369409		1332	2.68272	1.51131
1333	0.930823	0.23013		1333	0.505814	0.753326		1333	0.846619	0.394245
1334	1.0362	0.14993		1334	0.514617	0.470416		1334	1.02618	0.195741
1335	0.409355	0.144732		1335	0.268152	2.026		1335	0.456245	0.372463
1336	0.215067	0.312465		1336	0.286182	0.695856		1336	0.465099	0.497584
1337	0.354695	0.13355		1337	0.128039	0.160988		1337	0.452495	0.555883
1338	1.23116	0.389261		1338	1.21151	0.292915		1338	1.12104	0.555303
1339	1.00708	0.573562		1339	1.13624	0.425653		1339	1.30635	0.404726
1340	0.453258	0.477392		1340	0.777303	0.378285		1340	0.341043	1.23465
1341	0.475501	0.282253		1341	0.518602	0.173464		1341	0.663969	0.297547
1342	2.89813	1.52168		1342	0.532876	1.14139		1342	2.86677	1.13055
1343	1.29261	0.060059		1343	0.467228	1.47645		1343	1.76271	0.282284
1344	0.370467	0.226281		1344	1.79126	0.416746		1344	0.700325	0.251799
1345	1.20009	0.41527		1345	0.506232	0.524351		1345	1.62265	0.319378
1346	0.442636	0.157245		1346	1.11951	0.919894		1346	0.998157	0.342218
1347	1.00307	0.276349		1347	0.0576431	0.994647		1347	1.07166	0.615344
1348	0.600232	0.31881		1348	2.6504	3.46489		1348	0.602691	0.462453
1349	1.56058	0.16913		1349	0.333308	0.950426		1349	1.80424	0.510577
1350	0.135472	0.325589		1350	3.57664	0.556999		1350	0.420436	0.271656
1351	0.6542	0.278454		1351	2.36824	0.498043		1351	0.350735	0.276069
1352	0.998066	0.52019		1352	0.437428	0.863311		1352	1.32784	0.422546
1353	0.754989	0.831152		1353	0.849691	1.41141		1353	1.11597	1.61294
1354	1.68574	0.396106		1354	0.160144	1.27446		1354	1.61107	0.254576
1355	1.8016	0.0586559		1355	0.200061	0.364922		1355	1.5835	0.299231
1356	0.67527	1.3555		1356	0.849052	3.32067		1356	0.945911	0.95021
1357	0.40834	0.333356		1357	0.673673	0.899997		1357	0.493337	0.517997
1358	2.97751	0.317449		1358	0.858891	0.439538		1358	2.69954	0.245589
1359	0.31574	1.6247		1359	1.47708	1.45615		1359	0.39058	1.18894
1360	3.29722	0.0237302		1360	1.96471	1.0832		1360	2.95726	0.216681
1361	0.589673	0.433704		1361	0.566448	1.87624		1361	0.339503	0.461394
1362	0.423446	0.576704		1362	0.472514	0.243466		1362	0.720085	0.483594
1363	2.32724	0.141616		1363	0.205793	0.0773611		1363	2.16835	0.289639
1364	0.298252	-0.0270151		1364	0.488938	0.678987		1364	0.417646	0.31824
1365	0.82476	1.00088		1365	0.9482	0.884464		1365	0.489992	1.0224
1366	0.365348	0.616443		1366	0.739176	0.101086		1366	0.44574	0.322463
1367	0.170342	0.600903		1367	0.337491	0.48473		1367	0.729519	0.634486
1368	1.31209	0.16955		1368	1.66123	0.276386		1368	1.33456	0.194331
1369	0.478036	0.423197		1369	1.29029	1.21545		1369	0.261044	1.02711
1370	6.08878	4.36623		1370	0.178567	0.388645		1370	5.45549	4.92957
1371	0.600422	0.223182		1371	0.779457	0.310841		1371	1.11676	0.321891
1372	1.66117	1.02131		1372	0.954387	1.07598		1372	1.28707	0.83348
1373	0.115113	0.123633		1373	0.38675	0.22556		1373	0.285503	0.191469
1374	0.420357	0.424778		1374	0.732258	0.342812		1374	0.527466	0.396851
1375	3.24959	0.664595		1375	0.501202	0.888644		1375	3.22226	0.805022
1376	1.19506	0.405406		1376	0.335412	2.25366		1376	0.904663	0.932383
1377	1.29907	0.53287		1377	0.259367	0.935908		1377	1.25125	0.456218
1378	1.11371	2.48441		1378	0.287822	1.68102		1378	0.380452	2.58196
1379	0.589712	0.776332		1379	2.77993	1.09602		1379	0.52218	0.607457
1380	0.308008	0.425823		1380	1.24739	0.309027		1380	0.672012	0.277189
1381	0.487283	1.71882		1381	0.608184	0.652398		1381	0.481906	1.16962
1382	0.994193	0.424869		1382	0.166447	1.36762		1382	0.837819	0.74048
1383	0.280485	0.152857		1383	1.04231	0.244586		1383	0.367479	0.408265
1384	0.362729	0.396536		1384	0.116365	0.197139		1384	0.614894	0.540355
1385	2.03065	0.941775		1385	0.357697	0.902398		1385	1.55384	0.967858
1386	0.15852	0.712987		1386	0.12606	1.09755		1386	0.277766	0.773104
1387	0.532349	0.290064		1387	0.489191	1.04915		1387	0.440428	0.426829
1388	0.487051	1.32354		1388	0.147904	0.358439		1388	0.71906	1.54011
1389	0.795801	0.945242		1389	1.07713	1.71701		1389	1.9966	0.672016
1390	2.95239	0.977403		1390	1.13738	0.564799		1390	2.70645	0.653979
1391	1.19185	0.288079		1391	1.31884	0.504159		1391	2.00002	0.288156
1392	0.773036	0.350412		1392	0.472675	0.991862		1392	0.354147	0.772989
1393	0.216618	1.72496		1393	0.883784	0.565338		1393	0.53524	1.80905
1394	0.216796	1.20221		1394	3.80711	0.188705		1394	0.554766	1.30181
1395	0.344913	0.733782		1395	3.73272	3.4291		1395	0.943093	0.360631
1396	5.35269	0.44111		1396	3.526	0.68479		1396	3.98306	0.285812
1397	3.41096	0.291408		1397	0.951876	1.31964		1397	4.42236	0.318595
1398	2.79793	0.3421		1398	3.1019	0.593899		1398	2.02055	0.212745
1399	0.288544	0.285743		1399	0.393487	0.571496		1399	0.581943	0.290967
1400	2.00346	1.2776		1400	1.59672	0.262776		1400	1.77445	1.65861
1401	0.749082	0.477233		1401	1.16705	0.836976		1401	1.57918	0.42034
1402	0.620388	0.0573375		1402	0.412886	0.558194		1402	1.39415	0.2586
1403	1.72271	0.211208		1403	0.349981	0.314421		1403	1.9102	0.328573
1404	1.16143	0.326979		1404	0.418657	0.560646		1404	0.986577	0.413942
1405	1.81998	1.61004		1405	0.743426	0.610849		1405	1.76799	2.11198
1406	0.531453	0.17918		1406	0.702585	1.43357		1406	0.460587	0.166141
1407	0.703674	0.404042		1407	0.467531	1.14004		1407	0.40186	1.0048
1408	0.401975	0.468211		1408	2.67198	0.512635		1408	0.327801	0.554337
1409	0.456392	0.910364		1409	0.976734	0.473717		1409	0.849606	1.13271
1410	1.15291	0.421245		1410	0.568908	0.836718		1410	0.864369	0.575104
1411	1.61859	1.6997		1411	0.567401	0.326238		1411	1.11717	1.94656
1412	0.45027	0.657273		1412	0.723025	0.578346		1412	0.444637	0.658183
1413	3.01772	0.331007		1413	0.273387	0.0421264		1413	1.42428	0.274684
1414	0.669732	0.384191		1414	0.165019	2.11176		1414	0.356189	0.607622
1415	0.576054	0.161343		1415	0.575966	0.157292		1415	0.313726	0.361036
1416	2.53678	0.283073		1416	0.805332	0.212036		1416	2.27138	0.302212
1417	3.16148	0.495632		1417	2.28692	0.61009		1417	1.45801	0.807149
1418	1.72053	0.00691925		1418	0.961833	0.335138		1418	1.77153	0.168239
1419	0.74509	0.605166		1419	0.587103	0.495201		1419	0.734719	1.4512
1420	0.184241	0.224533		1420	3.63342	0.564669		1420	0.652324	0.234019
1421	0.20691	0.150929		1421	0.346676	0.88256		1421	0.424633	0.308449
1422	1.17578	0.381437		1422	0.165529	0.765834		1422	2.22789	0.414786
1423	0.722029	0.271543		1423	2.18663	0.232644		1423	0.519194	0.369168
1424	0.345355	2.12709		1424	0.40624	0.579542		1424	0.290485	1.9018
1425	1.21816	0.452647		1425	0.583474	1.16617		1425	0.604391	0.472807
1426	0.336937	0.0793064		1426	5.48299	0.877039		1426	0.557993	0.208565
1427	0.694161	0.343924		1427	0.231393	0.140481		1427	1.07087	0.740308
1428	1.56422	1.51041		1428	0.795701	0.446638		1428	1.22071	1.47122
1429	1.51555	0.3224		1429	0.637118	1.34369		1429	1.65119	0.260466
1430	0.779001	0.638284		1430	0.644234	0.22053		1430	0.740559	0.429157
1431	2.01896	0.167048		1431	0.254098	-0.0081447		1431	2.48185	0.644967
1432	1.73579	1.2079		1432	0.793093	0.470827		1432	1.34613	0.99774
1433	2.53691	0.237551		1433	0.836177	0.635929		1433	3.00528	0.21024
1434	0.402159	0.952001		1434	0.739412	0.732809		1434	0.347704	1.50302
1435	0.296062	1.01649		1435	1.78504	0.29279		1435	0.637818	1.1666
1436	0.203356	1.7623		1436	1.88459	0.6465		1436	0.438544	1.35709
1437	0.659115	0.17378		1437	1.16558	0.501079		1437	0.523572	0.281508
1438	0.549449	1.53874		1438	0.529862	3.35943		1438	0.291653	1.50139
1439	0.741385	0.169532		1439	2.56945	1.91859		1439	0.701652	0.470964
1440	1.72476	0.181882		1440	1.16011	1.45934		1440	1.3072	0.312786
1441	0.89974	0.328977		1441	0.166836	1.35031		1441	0.65148	0.386759
1442	0.414452	0.123413		1442	2.60139	0.551895		1442	0.532704	0.263625
1443	0.0925805	0.124967		1443	0.478643	0.146853		1443	0.310706	0.513605
1444	4.91955	0.39465		1444	5.20289	1.21275		1444	2.93245	0.362449
1445	1.53201	0.42519		1445	0.466479	0.48367		1445	1.40901	1.0067
1446	2.64359	0.254993		1446	1.62984	0.0895721		1446	2.16104	0.690723
1447	0.577339	0.351811		1447	0.92423	0.0487458		1447	0.592965	0.466202
1448	2.21684	0.222208		1448	1.10277	1.6967		1448	2.3264	0.321696
1449	1.03826	0.371367		1449	0.7177	0.451482		1449	0.502854	0.311061
1450	0.47228	2.4199		1450	1.30005	1.65871		1450	0.414794	2.75436
1451	1.38198	0.681789		1451	0.369238	2.3562		1451	0.956526	0.932299
1452	1.22117	0.325154		1452	1.0361	1.43041		1452	0.815656	0.291257
1453	1.94131	0.733895		1453	0.429804	0.480061		1453	1.34328	0.722482
1454	1.66479	0.445608		1454	3.45268	3.60333		1454	1.41376	0.418643
1455	0.762958	0.274154		1455	2.31665	0.721404		1455	0.653227	0.491345
1456	1.00225	0.206634		1456	0.886415	0.757486		1456	0.812473	0.253675
1457	1.10593	0.221337		1457	0.241557	0.265934		1457	1.0708	0.338195
1458	3.26643	0.170812		1458	0.876531	0.387725		1458	3.01552	0.380535
1459	2.81204	0.477774		1459	1.35956	0.213241		1459	1.94941	0.299158
1460	1.6619	0.188868		1460	0.366111	0.78829		1460	1.84249	0.940446
1461	0.346606	0.234634		1461	0.142406	2.13329		1461	0.751285	0.665579
1462	0.249561	0.914486		1462	0.0109572	0.626786		1462	0.218151	0.506229
1463	0.724962	0.163358		1463	2.31234	1.57775		1463	0.524014	0.26523
1464	1.04011	0.665348		1464	0.380674	0.490363		1464	0.761475	1.20024
1465	0.12805	0.501794		1465	1.18321	0.60558		1465	0.433549	0.480403
1466	0.444181	0.149951		1466	1.53905	0.472625		1466	0.770965	0.300993
1467	0.324944	0.328963		1467	0.870297	2.49745		1467	0.320642	0.358122
1468	0.550171	0.707382		1468	0.57119	1.15615		1468	0.517017	1.27683
1469	0.425843	2.24763		1469	0.543708	3.01376		1469	0.389943	1.95489
1470	0.357066	0.783529		1470	0.593137	0.197021		1470	0.568199	0.383363
1471	0.32359	0.280412		1471	0.360294	1.0079		1471	0.333367	0.695906
1472	0.352007	0.381578		1472	0.289642	1.19707		1472	0.454655	0.965149
1473	1.2431	0.582594		1473	2.93556	0.60119		1473	2.04368	1.31252
1474	0.3477	0.352944		1474	0.126566	0.272287		1474	0.778036	0.383175
1475	0.785936	0.0326983		1475	0.15652	0.456814		1475	1.02162	0.3921
1476	0.724995	0.278777		1476	0.306509	0.531973		1476	1.02409	0.964661
1477	1.138	1.13863		1477	0.518571	0.895074		1477	1.68186	1.4411
1478	1.2136	1.76137		1478	0.453027	0.292154		1478	1.65649	2.79301
1479	0.30174	0.279548		1479	0.243645	0.637232		1479	0.529733	0.434338
1480	0.647283	0.0550686		1480	1.01271	0.773968		1480	1.78364	0.445613
1481	0.280158	0.341453		1481	0.542385	0.210039		1481	0.840133	0.501371
1482	0.92597	0.721741		1482	1.67741	0.365019		1482	0.817032	0.935641
1483	0.811642	0.285102		1483	1.45964	1.05579		1483	1.32212	0.358485
1484	1.23965	1.49736		1484	0.245713	0.704011		1484	1.94	2.11042
1485	1.58669	2.57435		1485	0.918046	0.190661		1485	1.65178	3.94209
1486	0.876543	0.0733667		1486	0.2565	1.23462		1486	1.17162	0.247197
1487	0.297239	0.23435		1487	0.795681	0.480841		1487	0.557389	0.435954
1488	1.39637	-0.0175025		1488	0.480524	0.878998		1488	1.42557	0.224228
1489	0.480298	0.288054		1489	1.09887	1.26606		1489	0.556174	0.46009
1490	0.186793	0.296172		1490	0.413014	1.74567		1490	0.438231	1.19741
1491	1.44745	0.13305		1491	0.947592	0.179239		1491	1.21219	0.450769
1492	0.588016	-0.0144996		1492	1.16354	1.02066		1492	1.24991	0.195856
1493	3.69532	0.0767323		1493	3.06623	0.484119		1493	3.16745	0.303149
1494	0.318081	0.555383		1494	0.842842	1.85219		1494	0.321228	0.720628
1495	0.470162	0.150047		1495	0.679979	0.697109		1495	0.377043	0.331311
1496	1.187	0.269139		1496	0.461021	0.818938		1496	1.33939	0.496847
1497	0.509313	1.56573		1497	0.653134	0.558517		1497	0.455926	1.73825
1498	0.298259	0.0258726		1498	0.645185	0.513008		1498	0.376559	0.299045
1499	0.251815	0.291798		1499	0.886495	0.450671		1499	0.482453	0.472665
1500	2.326	1.06928		1500	0.529774	1.15309		1500	2.01962	1.14771
1501	0.445601	0.0211145		1501	3.0704	0.79106		1501	0.30214	0.225579
1502	0.915074	1.56271		1502	0.122896	0.752095		1502	1.19567	1.78896
1503	2.78858	0.91389		1503	0.524287	2.10736		1503	4.0145	0.994601
1504	1.47864	0.909241		1504	0.929873	0.395653		1504	1.59103	2.35951
1505	0.276754	0.108903		1505	0.395918	0.338675		1505	0.432819	0.279248
1506	1.09396	0.24747		1506	1.00404	1.22791		1506	1.47971	0.278625
1507	0.516477	0.13621		1507	0.118744	0.730788		1507	0.542608	0.280582
1508	0.92125	1.24566		1508	0.309108	0.432441		1508	1.15678	1.98506
1509	1.25475	0.841332		1509	0.235944	2.41416		1509	0.928705	0.704914
1510	1.54534	0.739441		1510	0.840802	0.603639		1510	1.44019	0.751869
1511	2.74694	0.529342		1511	0.256476	1.50028		1511	2.82946	1.21804
1512	0.83988	0.0712635		1512	0.851914	2.45085		1512	0.929623	0.2062
1513	0.707437	0.396755		1513	0.347064	1.94383		1513	0.543841	0.550549
1514	0.355142	2.52556		1514	0.520218	0.298391		1514	0.480805	3.67893
1515	0.843159	0.234245		1515	0.659152	0.47717		1515	0.860305	0.356212
1516	0.344227	0.46443		1516	0.32089	0.566506		1516	0.415034	0.520057
1517	0.297318	0.0790639		1517	0.21892	0.24575		1517	0.391781	0.25691
1518	0.651725	0.761563		1518	0.717933	0.161097		1518	1.00018	0.835856
1519	0.918781	0.59439		1519	0.771751	1.53916		1519	0.544913	0.948302
1520	0.125666	0.144839		1520	3.92204	0.484453		1520	0.308755	0.226351
1521	1.62819	0.722625		1521	1.47519	0.788203		1521	1.68405	0.983883
1522	0.557916	1.07929		1522	0.87278	0.77427		1522	0.908068	0.668997
1523	1.55256	0.319452		1523	0.560655	0.4773		1523	1.68958	0.215063
1524	0.553238	0.235258		1524	0.359951	0.530332		1524	0.830355	0.258645
1525	0.311461	0.431935		1525	0.404551	0.281795		1525	0.315885	0.429396
1526	1.18744	1.08587		1526	1.25858	0.412061		1526	1.25094	0.963644
1527	0.24232	0.945001		1527	1.53801	0.329689		1527	0.35232	0.728726
1528	2.5546	0.362166		1528		0.274034		1528	2.6324	0.327137
1529	0.371074	2.70833		1529		0.235988		1529	0.396116	2.34864
1530	0.340685	0.512223		1530		0.551183		1530	0.326658	0.544962
1531	0.76005	0.139332		1531		0.384668		1531	0.733993	0.336156
1532	0.240574	0.191287		1532		0.0918091		1532	0.719636	0.191733
1533	0.373714	1.78792		1533		0.763501		1533	0.455693	1.53932
1534	-0.0031605	1.54828		1534		0.314188		1534	0.39597	3.35175
1535	0.471357	0.720413		1535		0.621941		1535	1.04893	0.675234
1536	0.225214	0.248901		1536		0.350122		1536	0.239014	0.324733
1537	0.776259	0.0855665		1537		0.795372		1537	1.14132	0.39263
1538	0.402165	0.122939		1538		1.39528		1538	0.615447	0.409289
1539	0.664325	0.0643144		1539		0.234142		1539	1.08654	0.424607
1540	0.994009	1.59858		1540		0.288048		1540	0.66075	1.90618
1541	1.08586	0.283705		1541		1.10993		1541	0.97469	0.30027
1542	0.0741972	0.766392		1542		0.305826		1542	0.843653	1.02727
1543	0.0869112	0.540592		1543		4.34267		1543	0.270455	0.915798
1544	1.01238	0.0900074		1544		0.650706		1544	0.680701	0.306407
1545	1.50454	0.0625637		1545		0.534833		1545	1.79941	0.18731
1546	0.486914	0.0607352		1546		0.791973		1546	0.726796	0.347106
1547	1.49745	0.34165		1547		0.529601		1547	1.30627	0.29574
1548	0.197046	0.274002		1548		0.385966		1548	0.538845	0.334913
1549	0.637523	0.25208		1549		0.726701		1549	0.459035	0.223037
1550	0.872641	0.05547		1550		0.399667		1550	1.35136	0.369196
1551	0.149282	0.730683		1551		0.244445		1551	0.60116	0.802269
1552	0.554815	1.16236		1552		0.763059		1552	0.521018	1.08799
1553	0.36544	0.391662		1553		0.34785		1553	0.633251	0.549185
1554	1.69721	0.0501025		1554		0.272702		1554	1.76723	0.47
1555	1.42972	0.257838		1555		0.5676		1555	1.6941	0.629532
1556	1.57849	0.482911		1556		0.700962		1556	1.99616	0.384774
1557	0.569211	0.551346		1557		0.927692		1557	1.08005	0.366484
1558	0.475219	0.548951		1558		0.525613		1558	0.583956	0.993795
1559	0.0803015	0.1297		1559		0.517179		1559	0.352433	0.564269
1560	0.84229	0.147021		1560		1.12238		1560	0.660255	0.266059
1561	2.27345	0.171		1561		1.75586		1561	2.82911	0.242957
1562	0.308985	0.810056		1562		2.64884		1562	0.316488	0.818089
1563	0.0561138	0.334088		1563		0.348361		1563	0.502988	0.251142
1564	1.327	0.226314		1564		0.115875		1564	1.12087	0.416445
1565	0.610436	0.739234		1565		0.379874		1565	0.510491	0.899589
1566	1.26397	0.787691		1566		0.304674		1566	1.47806	0.71329
1567	1.74535	0.06086		1567		0.341012		1567	1.32552	0.323292
1568	0.727689	0.563902		1568		0.579171		1568	0.804725	0.991572
1569	0.53761	1.10406		1569		0.445377		1569	0.46553	0.627396
1570	0.0551938	0.186297		1570		0.449697		1570	0.404535	0.504553
1571	0.618422	0.595374		1571		1.15636		1571	0.512774	0.680113
1572	0.646953	0.340515		1572		1.27191		1572	0.661553	0.290617
1573	0.658253	0.430299		1573		0.352479		1573	0.587064	0.609066
1574	0.795854	1.904		1574		0.74849		1574	0.690851	1.38888
1575	1.02072	0.324725		1575		1.87985		1575	0.829261	0.498481
1576	0.544301	1.93652		1576		1.63141		1576	0.25502	1.51418
1577	1.67089	0.281225		1577		0.79535		1577	1.29479	0.520288
1578	0.915379	1.47571		1578		1.19581		1578	0.604642	1.6872
1579	0.530408	0.251418		1579		0.574124		1579	1.23248	0.503355
1580	0.640499	0.374134		1580		2.76521		1580	0.764755	0.500643
1581	0.548943	0.381827		1581		0.902441		1581	0.336928	0.572063
1582	0.521298	0.321111		1582		0.654849		1582	0.558133	0.434809
1583	2.11941	0.352382		1583		0.141834		1583	2.77012	0.236329
1584	0.642966	0.241717		1584		1.37101		1584	1.05452	0.331307
1585	0.164959	0.78102		1585		0.381789		1585	0.245522	0.901523
1586	1.55429	0.261664		1586		0.784235		1586	1.91901	0.35409
1587	0.678146	0.231058		1587		1.76706		1587	0.841933	0.269469
1588	0.203783	0.277803		1588		0.739728		1588	0.286427	0.291151
1589	0.813621	0.347723		1589		0.901902		1589	0.824613	0.96542
1590	0.411203	0.754361		1590		0.50448		1590	0.559994	0.50439
1591	1.6108	1.66515		1591		0.962754		1591	0.862171	1.79101
1592	0.236863	0.238276		1592		1.06146		1592	0.582137	0.229961
1593	0.218549	0.385018		1593		0.176805		1593	0.315748	0.381025
1594	0.650567	0.511992		1594		0.218053		1594	0.442627	0.375336
1595	0.234705	1.22754		1595		0.34393		1595	0.512101	0.992957
1596	1.6282	2.39355		1596		0.115062		1596	1.82565	1.52785
1597	0.153725	0.533591		1597		1.07752		1597	0.320876	0.827176
1598	0.573983	0.318643		1598		2.75748		1598	0.621798	0.464791
1599	0.402795	0.676988		1599		1.29088		1599	0.75202	1.42754
1600	0.516235	0.706931						1600	0.750662	0.322348
1601	0.635394	0.142421						1601	0.61978	0.208646
1602	0.735618	1.26936						1602	0.715698	1.0456
1603	0.343807	0.675422						1603	0.237935	0.635303
1604	0.252181	0.64017						1604	0.650832	0.25435
1605	0.202175	0.0695999						1605	0.324777	0.316163
1606	0.7185	0.271858						1606	0.761303	0.266286
1607	1.59726	0.73204						1607	1.4461	0.819425
1608	0.444339	0.532376						1608	0.309273	0.336984
1609	1.53736	0.533935						1609	0.811397	0.961312
1610	2.37856	0.695788						1610	1.93822	0.978194
1611	1.08204	1.62133						1611	1.06136	1.45023
1612	2.72081	0.158742						1612	2.84307	0.345105
1613	2.31061	0.446048						1613	2.61094	0.420965
1614	1.19321	1.68214						1614	1.73038	1.70052
1615	1.29336	1.14329						1615	1.1633	1.53732
1616	0.18497	2.30636						1616	0.323458	2.39678
1617	0.418148	1.75527						1617	0.505651	2.83582
1618	0.773136	0.515899						1618	0.828635	0.718834
1619	0.943447	1.00485						1619	1.0722	1.20825
1620	1.62217	0.336584						1620	1.95378	0.456665
1621	0.87719	1.12075						1621	0.87249	0.7353
1622	0.00300771	0.178852						1622	0.72867	0.48393
1623	1.04084	0.753218						1623	1.26591	0.532968
1624	0.697472	1.14385						1624	0.74304	0.93373
1625	0.568478	1.21525						1625	1.52326	1.6497
1626	2.92284	2.75004						1626	3.73155	2.35302
1627	0.243461	0.283412						1627	0.378873	0.546386
1628	0.0332454	3.09404						1628	0.486234	2.39343
1629	1.12977	0.582293						1629	1.91228	0.572093
1630	2.20713	1.96791						1630	2.39307	2.33721
1631	0.345177	1.03982						1631	0.629667	0.713056
1632	0.329069	1.63785						1632	0.589336	3.47938
1633	0.453734	0.201421						1633	0.632988	0.348675
1634	0.51074	0.738528						1634	0.796687	0.802758
1635	0.794798	0.113438						1635	0.634874	0.374207
1636	1.41919	0.773108						1636	0.971867	0.996933
1637	0.0945722	0.983935						1637	0.494652	1.46939
1638	1.51305	0.94915						1638	1.05575	0.995988
1639	2.01715	0.570944						1639	1.35951	0.976606
1640	3.39194	1.02372						1640	2.13481	1.78519
1641	0.279908	0.229592						1641	0.61154	0.358186
1642	0.884113	0.365102						1642	0.523816	0.799278
1643	0.734298	0.283499						1643	0.934193	0.510626
1644	1.10945	0.113673						1644	0.892254	0.486627
1645	1.26152	2.72925						1645	1.20533	2.23495
1646	0.414132	0.213407						1646	0.545465	0.432802
1647	0.622365	0.447695						1647	0.549141	0.620778
1648	0.251613	0.610328						1648	0.356905	0.580186
1649	0.239034	2.19334						1649	0.388372	3.19836
1650	0.119852	3.53744						1650	0.338266	3.18721
1651	0.225495	0.102973						1651	0.796031	0.487386
1652	0.448378	2.19756						1652	0.566922	1.94371
1653	0.37424	0.611997						1653	0.327179	0.821799
1654	0.657859	0.38884						1654	0.541154	1.50376
1655	5.27964	1.06521						1655	4.20433	1.08164
1656	1.48967	0.522393						1656	1.67677	0.62097
1657	0.349893	1.85734						1657	1.00306	1.59689
1658	1.26593	0.999074						1658	1.42962	0.772574
1659	0.248151	0.224764						1659	0.629804	0.33219
1660	1.61481	0.307098						1660	1.43371	0.421014
1661	0.450015	0.162869						1661	0.495694	0.449403
1662	0.339538	0.114032						1662	0.379905	0.453546
1663	0.240318	0.377013						1663	0.492306	0.552361
1664	1.47232	0.231297						1664	1.16992	0.4802
1665	0.215904	0.201947						1665	0.431868	0.481048
1666	2.73643	2.70784						1666	1.81615	2.22432
1667	2.36482	2.32596						1667	2.38512	2.41799
1668	0.0332073	2.23349						1668	0.374342	1.29518
1669	0.215254	2.14005						1669	0.341653	1.51032
1670	1.27571	1.48098						1670	1.07947	2.18644
1671	0.187143	3.64022						1671	0.347436	3.18544
1672	2.25673	1.67333						1672	1.98556	1.5765
1673	0.654717	0.372801						1673	1.03617	0.326597
1674	2.33287	0.202279						1674	2.28394	0.359769
1675	0.897199	0.616621						1675	1.03804	1.08086
1676	0.827375	0.949361						1676	0.684837	1.34115
1677	0.95399	0.304227						1677	0.664197	0.55734
1678	1.16111	1.28706						1678	0.726494	1.715
1679	1.00152	0.0736556						1679	1.04501	0.596865
1680	0.939901	1.46666						1680	0.574056	1.98022
1681	0.34026	0.832395						1681	0.375701	1.5125
1682	0.483678	0.469172						1682	0.270634	0.443091
1683	0.536896	0.514012						1683	0.703475	0.46315
1684	0.291624	0.235418						1684	0.783119	0.375481
1685	0.334548	0.492219						1685	0.419094	0.654967
1686	0.624847	0.672241						1686	0.685159	0.534647
1687	1.08404	0.292666						1687	1.04015	0.427096
1688	0.528656	0.448242						1688	0.363871	0.423695
1689	2.00854	0.258839						1689	1.10715	0.395499
1690	1.31549	1.85637						1690	0.586453	1.39486
1691	4.50773	0.95159						1691	2.66779	0.620685
1692	0.88794	0.135329						1692	0.547121	0.287619
1693	0.930942	1.01115						1693	0.791179	1.04372
1694	1.40389	0.968791						1694	0.9884	1.44016
1695	0.9649	0.73322						1695	0.933149	0.504942
1696	1.48256	4.0314						1696	1.12023	3.37826
1697	1.94146	0.128305						1697	1.53644	0.445097
1698	0.419725	0.323756						1698	0.30596	0.382367
1699	0.480095	0.732782						1699	0.27921	0.480207
1700	4.13498	2.67867						1700	3.27289	1.90337
1701	0.172253	0.441604						1701	0.437246	0.489922
1702	1.65002	1.85089						1702	1.4757	1.60489
1703	0.0859414	1.23376						1703	0.479889	1.33158
1704	2.49897	0.313851						1704	1.71309	0.527555
1705	0.554494	0.949665						1705	1.1391	1.46441
1706	0.152663	0.971704						1706	0.422592	0.84803
1707	0.619704	0.904631						1707	0.349074	1.01307
1708	0.472071	0.80086						1708	0.6965	0.772711
1709	0.316336	0.664101						1709	0.390096	0.922315
1710	0.461456	1.06001						1710	0.480657	0.693503
1711	0.725156	2.16037						1711	0.637543	1.57822
1712	0.989052	0.306642						1712	0.436084	0.56695
1713	1.53808	0.0856875						1713	1.10463	0.288013
1714	1.04747	0.285394						1714	0.660314	0.618084
1715	0.801193	0.11108						1715	0.854187	0.386624
1716	0.209829	3.76934						1716	0.415936	3.00648
1717	0.686813	0.700432						1717	0.967431	0.602169
1718	1.8676	0.471663						1718	1.34136	0.59162
1719	0.467407	0.44505						1719	0.266635	0.70014
1720	7.17256	1.1037						1720	3.76796	0.458544
1721	0.635497	4.43612						1721	0.514736	2.69992
1722	0.64855	0.465701						1722	0.41766	0.684842
1723	3.14834	0.410831						1723	2.609	0.400541
1724	0.761227	0.327441						1724	0.527393	0.373822
1725	0.396875	0.522873						1725	0.413382	0.624651
1726	0.709745	0.685805						1726	1.05288	0.612705
1727	1.68107	1.52507						1727	1.57099	1.04024
1728	1.13705	0.456692						1728	1.3656	1.45916
1729	2.67053	2.44237						1729	2.78134	2.92965
1730	0.89159	0.041678						1730	1.26673	0.616859
1731	0.335539	0.511361						1731	0.342211	1.66068
1732	0.422943	0.0392957						1732	0.558597	0.422031
1733	0.371058	0.140583						1733	0.522234	0.665569
1734	1.73988	0.599507						1734	1.48244	0.482727
1735	1.81784	0.271144						1735	1.88651	0.915143
1736	1.45609	0.262758						1736	1.42346	0.5265
1737	2.19031	0.466989						1737	1.43877	1.21435
1738	2.88244	0.497312						1738	3.05191	1.97583
1739	0.198544	0.172594						1739	0.280379	0.711063
1740	0.873557	0.305071						1740	0.7292	0.516292
1741	0.441237	0.116858						1741	0.241893	0.450033
1742	0.421941	1.16842						1742	0.372805	1.76495
1743	0.304839	0.078398						1743	0.3806	0.408784
1744	2.34702	1.86845						1744	2.18536	2.16328
1745	0.337547	0.581489						1745	0.385134	2.02128
1746	0.370655	2.25802						1746	0.514657	2.24909
1747	2.07522	0.0810652						1747	1.50434	0.507214
1748	0.54049	1.26287						1748	0.555813	1.45496
1749	2.67432	0.363847						1749	1.77578	0.674342
1750	1.87438	0.311203						1750	1.96893	0.400201
1751	3.83475	2.04147						1751	1.90863	3.72548
1752	1.71315	3.20606						1752	1.28821	2.92295
1753	1.26771	5.01598						1753	1.69222	3.79038
1754	1.66086	1.19995						1754	1.08764	2.2535
1755	0.385497	1.41973						1755	0.491596	1.152
1756	0.642505	1.0183						1756	1.11291	0.858257
1757	0.341227	0.365497						1757	0.386692	0.743425
1758	0.230445	0.698525						1758	0.458215	1.03928
1759	0.260271	0.949365						1759	0.386595	1.61965
1760	0.210206	3.22274						1760	0.393844	3.01842
1761	0.751303	0.691965						1761	0.750155	0.826084
1762	0.409571	0.214219						1762	0.606339	0.633455
1763	0.704321	0.543364						1763	0.449324	0.591056
1764	0.60798	0.386044						1764	0.803752	0.574756
1765	1.24463	0.902507						1765	1.20039	1.21623
1766	0.176174	0.128048						1766	0.411218	0.674245
1767	0.393002	0.127971						1767	0.492322	0.42224
1768	0.66835	1.91436						1768	0.774815	1.53091
1769	0.690035	0.556749						1769	0.779343	0.71286
1770	0.411144	0.743201						1770	0.418853	2.15297
1771	1.3086	0.68926						1771	0.736923	0.813726
1772	0.521355	0.475408						1772	0.789919	0.419315
1773	0.70265	1.78346						1773	0.98044	1.66737
1774	0.275055	0.729695						1774	0.348517	0.603809
1775	4.9103	0.804208						1775	4.39817	1.46072
1776	2.02031	1.44079						1776	1.30709	1.50537
1777	0.49698	0.101146						1777	0.34701	0.75875
1778	0.732538	0.67721						1778	0.358767	0.987891
1779	0.585972	0.363284						1779	0.299918	0.529943
1780	0.376003	0.539551						1780	0.338891	0.457773
1781	1.91853	1.5229						1781	1.71216	1.14494
1782	2.73737	0.827625						1782	3.76469	0.842374
1783	0.396259	1.14732						1783	0.393698	1.50354
1784	2.11888	0.16992						1784	1.16175	0.510955
1785	1.0259	0.638325						1785	0.568724	2.09109
1786	0.265756	0.17649						1786	0.342326	0.758311
1787	0.187992	0.946328						1787	0.364177	1.22372
1788	0.32106	0.729504						1788	0.291801	0.682833
1789	0.732894	4.11101						1789	0.921826	2.17214
1790	2.17295	0.747013						1790	1.74823	0.633454
1791	0.279266	0.255602						1791	0.293525	0.412936
1792	1.34857	1.25697						1792	0.679319	1.26834
1793	1.69675	0.209587						1793	1.43369	0.528812
1794	0.456085	0.540136						1794	0.449965	0.72018
1795	0.63982	1.77058						1795	0.455171	0.983857
1796	1.403	0.523136						1796	1.30738	0.432088
1797	0.370962	0.398115						1797	0.664108	0.932614
1798	0.186068	1.53489						1798	0.312703	2.1342
1799	1.23233	1.41044						1799	0.765292	2.49865
1800	1.48748	2.41511						1800	1.27784	2.49569
1801	0.976806	0.81295						1801	0.909331	0.753779
1802	0.258246	0.644306						1802	0.389405	1.194
1803	2.3062	0.823621						1803	1.2225	0.845233
1804	0.450639	0.381404						1804	0.57059	0.467224
1805	2.7139	0.685709						1805	2.18678	0.617012
1806	0.653208	2.03683						1806	0.463548	2.42442
1807	0.72861	0.299598						1807	0.612228	0.553935
1808	1.72003	0.382189						1808	1.30206	0.546236
1809	0.836093	1.35627						1809	0.739026	1.9723
1810	0.0792903	0.4692						1810	0.277243	0.68237
1811	4.48782	1.14851						1811	3.22558	1.28109
1812	0.383276	0.808694						1812	0.451651	0.426558
1813	0.544134	1.36415						1813	0.601793	1.31782
1814	0.17086	0.591027						1814	0.804892	0.720453
1815	0.48549	1.87248						1815	0.903069	1.52882
1816	1.28278	0.928736						1816	1.90713	1.31566
1817	0.593145	1.58036						1817	0.468699	1.64731
1818	0.329315	0.313241						1818	0.650841	0.65375
1819	0.567583	0.353251						1819	0.51987	0.579068
1820	0.72029	0.956789						1820	0.674448	0.933102
1821	0.0498794	0.603035						1821	0.319781	0.722547
1822	0.122679	2.582						1822	0.860846	3.44956
1823	0.683053	0.608525						1823	0.641585	0.494308
1824	0.339634	0.899256						1824	1.0094	1.07856
1825	0.94807	0.350727						1825	1.01678	0.769148
1826	0.432797	0.762181						1826	0.646685	0.561509
1827	1.03046	2.53611						1827	0.812623	3.46275
1828	0.852559	0.709134						1828	1.00146	0.636034
1829	0.382651	0.48998						1829	0.44149	0.353382
1830	0.24049	2.38397						1830	0.466982	2.95055
1831	0.323251	1.13721						1831	0.604717	1.23555
1832	0.39999	0.945406						1832	0.483312	1.41495
1833	0.305603	0.463526						1833	0.38403	1.13182
1834	1.33508	2.34923						1834	1.38606	2.44326
1835	0.843918	1.70971						1835	0.824452	2.44024
1836	0.932111	0.439274						1836	1.23414	0.584182
1837	0.58637	0.434929						1837	0.42341	0.45719
1838	1.5978	0.347385						1838	2.20357	0.375823
1839	1.86979	1.00666						1839	2.90013	0.898289
1840	1.13452	0.868599						1840	0.991961	0.437473
1841	0.393261	1.21276						1841	0.489964	1.58528
1842	0.631946	0.174339						1842	1.14421	0.508468
1843	0.187571	0.0100382						1843	0.72581	0.495988
1844	0.986536	1.32648						1844	1.43538	0.994327
1845	0.640228	0.132804						1845	0.832727	0.504547
1846	0.698494	0.643968						1846	0.560357	0.991725
1847	2.33461	0.171937						1847	2.078	0.745654
1848	0.374913	0.657803						1848	0.449679	0.61543
1849	0.193432	0.323606						1849	0.352256	0.513187
1850	2.71909	1.3186						1850	2.45775	0.764214
1851	1.50678	1.65548						1851	1.08718	1.09104
1852	0.788266	2.07552						1852	1.93534	1.8611
1853	0.205923	1.74397						1853	0.450212	1.27089
1854	1.79355	0.453825						1854	1.5197	0.472923
1855	0.137165	2.35525						1855	0.371081	2.48284
1856	0.933244	0.437336						1856	0.68919	0.474562
1857	1.47543	0.383789						1857	0.874107	0.575152
1858	0.328177	0.530657						1858	0.62302	1.39661
1859	2.47102	2.2712						1859	1.9496	2.37239
1860	4.68533	1.43514						1860	4.62562	2.86764
1861	2.70945	0.769338						1861	1.72727	1.23856
1862	0.969048	1.17697						1862	1.63496	1.39355
1863	0.830845	0.204716						1863	0.784562	1.33845
1864	2.71989	0.33361						1864	1.61137	0.774648
1865	0.261253	0.136876						1865	0.352955	0.785796
1866	2.32544	0.966265						1866	2.40656	2.69603
1867	0.445253	0.17691						1867	0.760527	1.02126
1868	0.185141	0.629078						1868	0.415161	0.729276
1869	1.28824	0.196454						1869	2.42845	0.531177
1870	1.53768	1.08897						1870	1.12507	1.64796
1871	0.594861	0.49194						1871	0.808535	0.584313
1872	0.883685	0.425872						1872	1.55598	0.440465
1873	1.27109	0.109793						1873	2.25991	0.439391
1874	0.830591	0.22493						1874	0.721257	0.768646
1875	0.769086	0.494106						1875	1.65949	0.700123
1876	0.0589703	0.529335						1876	0.478301	0.513813
1877	0.183563	0.48608						1877	0.455616	0.844918
1878	0.675658	0.707763						1878	0.449267	1.47956
1879	0.207074	0.479721						1879	0.471053	1.11945
1880	0.339586	0.252323						1880	0.551527	0.381902
1881	0.714247	0.34223						1881	0.953708	0.755484
1882	0.416779	0.25234						1882	0.476693	0.901714
1883	2.77773	0.37143						1883	3.29087	1.09461
1884	0.435198	1.72191						1884	0.548549	2.82635
1885	3.32673	0.371021						1885	3.31103	0.632319
1886	0.89226	0.37778						1886	0.968128	0.609145
1887	0.92293	1.57038						1887	1.2762	2.87254
1888	0.262482	0.691748						1888	0.357755	0.698668
1889	0.641795	0.145579						1889	1.67022	0.460295
1890	0.767785	1.0254						1890	0.700006	0.869285
1891	0.492709	2.15041						1891	0.428344	2.84146
1892	2.77735	1.93692						1892	2.48228	2.53519
1893	0.900633	0.881598						1893	0.69038	0.835059
1894	0.211651	0.768792						1894	0.537531	1.12074
1895	2.33226	2.09218						1895	1.99802	2.30292
1896	0.341713	0.164159						1896	0.497106	0.505422
1897	0.621696	0.550279						1897	1.00567	0.548226
1898	0.430065	0.714182						1898	0.317826	0.834284
1899	1.71101	0.572133						1899	1.64049	0.513436
1900	0.118837	1.42986						1900	0.388724	1.42258
1901	0.966232	1.38006						1901	0.77252	0.679858
1902	1.39354	0.780778						1902	1.0941	0.779427
1903	1.31661	0.677998						1903	1.9736	0.724629
1904	2.86387	1.16643						1904	2.09531	1.85302
1905	0.498109	0.277772						1905	0.338652	0.522709
1906	0.537662	1.25122						1906	0.376425	1.20003
1907	0.449381	0.554361						1907	0.291525	1.12568
1908	1.0227	1.07847						1908	0.820997	1.5731
1909	0.729035	1.15721						1909	0.549956	1.56918
1910	0.0242219	0.611097						1910	0.464508	0.667492
1911	0.121232	2.06552						1911	0.316875	2.8364
1912	1.20569	1.01394						1912	1.03428	0.981299
1913	0.484905	0.631841						1913	0.518709	0.583799
1914	2.26346	1.11801						1914	1.78925	0.799523
1915	1.13281	2.20612						1915	0.778366	2.54726
1916	0.346747	0.201197						1916	0.428758	0.631792
1917	1.41288	0.567479						1917	0.667901	0.552408
1918	1.23606	0.135245						1918	1.06573	0.681373
1919	0.644383	0.954594						1919	0.641734	0.75846
1920	0.273403	0.453759						1920	0.381404	0.522432
1921	2.62683	0.255173						1921	1.60319	0.6598
1922	0.422929	0.60149						1922	0.362171	0.694237
1923	1.07871	1.65583						1923	0.88869	1.11475
1924	0.583655	2.84868						1924	0.764736	1.49953
1925	0.291985	1.37204						1925	0.417043	1.02877
1926	0.125384	1.1712						1926	0.234659	0.69754
1927	0.717891	2.02828						1927	0.504057	1.93346
1928	1.0582	0.529717						1928	0.632518	0.74941
1929	0.585829	0.165676						1929	0.535318	0.625874
1930	0.130136	1.82875						1930	0.39129	1.83481
1931	0.64132	0.545598						1931	1.10537	0.386883
1932	0.171564	0.4801						1932	0.328196	0.545583
1933	0.744074	3.92105						1933	0.514871	3.48066
1934	1.1738	0.439674						1934	1.57981	0.765236
1935	1.51502	1.45124						1935	1.11093	0.867377
1936	0.315572	0.517705						1936	0.376982	0.638725
1937	1.17122	1.23775						1937	0.850812	0.889283
1938	0.871918	0.341792						1938	1.13175	0.275962
1939	2.04192	0.40875						1939	1.77041	0.79624
1940	1.04206	1.06145						1940	0.938497	1.43356
1941	1.09407	0.429418						1941	1.18313	0.619331
1942	0.785747	0.31413						1942	0.656282	1.00313
1943	1.08727	1.17986						1943	0.969861	0.770235
1944	0.332947	1.27081						1944	0.381996	2.34923
1945	0.263852	1.58255						1945	0.478148	1.47474
1946	0.479022	1.08401						1946	0.649072	1.02827
1947	0.070997	0.836372						1947	0.834751	1.15993
1948	1.88557	0.574467						1948	2.60937	0.40389
1949	0.500594	0.330862						1949	0.852171	0.986315
1950	0.975622	2.58475						1950	1.18928	3.76673
1951	1.56135	1.83822						1951	3.60372	1.47326
1952	0.695936	0.578964						1952	0.873717	0.830009
1953	0.224485	0.450787						1953	0.526418	0.338893
1954	0.898061	0.463761						1954	1.2623	1.47473
1955	1.60097	0.963732						1955	0.970609	0.941791
1956	0.485968	0.139148						1956	0.507055	0.547537
1957	0.98174	3.39303						1957	1.02256	2.60567
1958	1.06667	2.12581						1958	0.778541	3.07919
1959	1.51531	0.341054						1959	1.94453	1.31346
1960	0.295934	0.360896						1960	0.598566	0.417706
1961	0.335093	0.201959						1961	0.505146	0.624136
1962	2.71516	2.07217						1962	2.15872	1.63629
1963	1.4793	0.545519						1963	1.51879	0.994804
1964	0.540326	0.209457						1964	0.627464	0.82939
1965	2.17707	1.00413						1965	1.42731	0.806208
1966	0.410787	4.25454						1966	0.68541	4.78071
1967	0.748809	0.681782						1967	0.937611	0.449096
1968	0.0823791	0.934695						1968	0.259298	1.67008
1969	0.198463	0.578085						1969	0.294448	1.11082
1970	2.5317	0.00761273						1970	2.23872	0.475154
1971	0.168606	1.51037						1971	0.262343	2.25304
1972	2.82629	0.468199						1972	1.70978	0.541182
1973	0.594881	0.394487						1973	0.61783	0.606961
1974	0.45902	1.26451						1974	0.652701	1.47615
1975	2.24165	1.27222						1975	1.6706	1.09231
1976	0.539039	0.320187						1976	0.50396	1.35402
1977	0.544005	0.586279						1977	0.456695	0.582326
1978	0.533113	1.24664						1978	0.703205	0.698916
1979	0.241603	0.4716						1979	0.359586	1.17645
1980	0.345374	1.50833						1980	0.380974	1.48886
1981	0.321359	1.22302						1981	0.516536	0.821544
1982	0.423748	0.289505						1982	0.49134	0.67795
1983	0.743275	0.493765						1983	0.89523	1.94546
1984	0.456459	0.613036						1984	0.601208	0.679754
1985	2.07811	2.13723						1985	1.53617	2.35436
1986	0.25387	0.785165						1986	0.288812	1.33939
1987	0.882855	0.583531						1987	0.665389	0.90071
1988	1.98463	0.570732						1988	3.0944	0.612475
1989	1.54554	1.14653						1989	1.16818	0.761271
1990	1.37746	0.429546						1990	0.852575	0.6289
1991	1.60294	0.389705						1991	1.30426	0.489198
1992	0.581823	0.394388						1992	0.62056	1.60292
1993	0.260348	1.19165						1993	0.399225	1.90474
1994	1.9656	0.547631						1994	2.83549	0.487345
1995	1.91732	2.66356						1995	1.59544	1.53865
1996	1.26825	0.165968						1996	0.856757	0.351911
1997	1.04834	0.429135						1997	0.894877	0.299628
[truncated: 300 more rows]

## Sheet: Fig5D
distance (nm)
	WT	KO
	61.517	66.9455
	59.933	60.6872
	58.3648	65.096
	64.9928	63.3496
Mean	61.2019	64.0196
SEM	1.41804	1.33146
n	4	4
